# Supplementary material
Source: publisher site journal article supplement (https://www.dovepress.com/article/138519)

# Supplementary material

## GABA DOSE Supplemental Digital Content

### Supplemental Digital Content 1 Search strategies

#### **Preliminary searches performed 13 November 2013**

Total number of references identified: 16895 references

Number of duplicates removed: 3189 references

Number of references in final list: 13706 references

Batch name: 131113\_J Wetterslev\_GABA

Cochrane Central Register of Controlled Trials (CENTRAL)(Issue 10 of 12, 2013) in The Cochrane Library (2411 hits in CENTRAL)

#1 MeSH descriptor: [Amines] explode all trees and with qualifiers: [Adverse effects - AE, Therapeutic use - TU]

#2 MeSH descriptor: [gamma-Aminobutyric Acid] explode all trees and with qualifiers: [Adverse effects - AE, Therapeutic use - TU]

#3 MeSH descriptor: [Cyclohexanecarboxylic Acids] explode all trees and with qualifiers: [Adverse effects - AE, Therapeutic use - TU]

#4 (gaba\* or neurontin\* or neurotonin\* or horizant\*)

#5 #1 or #2 or #3 or #4

#6 MeSH descriptor: [Pain] explode all trees

#7 pain\*

#8 #6 or #7

#9 #5 and #8

#10 adult\* or middle age\* or aged

#11 #9 and #10

MEDLINE (Ovid SP)(1946 to November 2013)(7072 hits)

1. exp Amines/ae, tu [Adverse Effects, Therapeutic Use]

2. exp gamma-Aminobutyric Acid/ae, tu [Adverse Effects, Therapeutic Use]

3. exp Cyclohexanecarboxylic Acids/ae, tu [Adverse Effects, Therapeutic Use]

4. (gaba\* or neurontin\* or neurotonin\* or horizant\*).mp. [mp=title, abstract, original title, name of substance word, subject heading word, keyword heading word, protocol supplementary concept, rare disease supplementary concept, unique identifier]

5. 1 or 2 or 3 or 4

6. exp Pain/

7. pain\*.mp. [mp=title, abstract, original title, name of substance word, subject heading word, keyword heading word, protocol supplementary concept, rare disease supplementary concept, unique identifier]

8. 6 or 7

9. 5 and 8

10. limit 9 to (humans and ("all adult (19 plus years)" or "young adult (19 to 24 years)" or "adult (19 to 44 years)" or "young adult and adult (19-24 and 19-44)" or "middle age (45 to 64 years)" or "middle aged (45 plus years)" or "all aged (65 and over)" or "aged (80 and over)"))

EMBASE (1974 to November 2013)(3653 hits)

1. amine/ae, dt, th [Adverse Drug Reaction, Drug Therapy, Therapy]
2. 4 aminobutyric acid/ae, dt [Adverse Drug Reaction, Drug Therapy]
3. cyclohexanecarboxylic acid derivative/ae, dt [Adverse Drug Reaction, Drug Therapy]
4. (gaba\* or neurontin\* or neurotonin\* or horizant\*).mp. [mp=title, abstract, subject headings, heading word, drug trade name, original title, device manufacturer, drug manufacturer, device trade name, keyword]
5. 1 or 2 or 3 or 4
6. exp pain/
7. pain\*.mp. [mp=title, abstract, subject headings, heading word, drug trade name, original title, device manufacturer, drug manufacturer, device trade name, keyword]
8. 6 or 7
9. 5 and 8
10. limit 9 to (human and (adult <18 to 64 years> or aged <65+ years>))

Science Citation Index Expanded (<http://apps.webofknowledge.com>)(1900 to November 2013)(3759 hits)

#3 3,759 #2 AND #1

#2 385,187 TS=(pain\*)

#1 68,630 TS=(gaba\* or neurontin\* or neurotonin\* or horizant\*)

#### **Preliminary searches performed 30 June 2014**

Total number of references identified: 16861 references

Number of duplicates removed: 3592 references

Number of references in final list: 13569 references

Number of new references: 789 references

Batch name: 140701\_J Wetterslev\_GABA

Cochrane Central Register of Controlled Trials (CENTRAL)(Issue 6 of 12, 2014) in The Cochrane Library (2619 hits in CENTRAL)

#1 MeSH descriptor: [Amines] explode all trees and with qualifiers: [Adverse effects - AE, Therapeutic use - TU]

#2 MeSH descriptor: [gamma-Aminobutyric Acid] explode all trees and with qualifiers: [Adverse effects - AE, Therapeutic use - TU]

#3 MeSH descriptor: [Cyclohexanecarboxylic Acids] explode all trees and with qualifiers: [Adverse effects - AE, Therapeutic use - TU]

#4 (gaba\* or neurontin\* or neurotonin\* or horizant\*)

#5 #1 or #2 or #3 or #4

#6 MeSH descriptor: [Pain] explode all trees

#7 pain\*

#8 #6 or #7

#9 #5 and #8

#10 adult\* or middle age\* or aged

#11 #9 and #10

MEDLINE (Ovid SP)(1946 to July 2014)(6319 hits)

1. exp Amines/ae, tu [Adverse Effects, Therapeutic Use]

2. exp gamma-Aminobutyric Acid/ae, tu [Adverse Effects, Therapeutic Use]

3. exp Cyclohexanecarboxylic Acids/ae, tu [Adverse Effects, Therapeutic Use]

4. (gaba\* or neurontin\* or neurotonin\* or horizant\*).mp. [mp=title, abstract, original title, name of substance word, subject heading word, keyword heading word, protocol supplementary concept, rare disease supplementary concept, unique identifier]
5. 1 or 2 or 3 or 4
6. exp Pain/
7. pain\*.mp. [mp=title, abstract, original title, name of substance word, subject heading word, keyword heading word, protocol supplementary concept, rare disease supplementary concept, unique identifier]
8. 6 or 7
9. 5 and 8
10. limit 9 to (humans and ("all adult (19 plus years)" or "young adult (19 to 24 years)" or "adult (19 to 44 years)" or "young adult and adult (19-24 and 19-44)" or "middle age (45 to 64 years)" or "middle aged (45 plus years)" or "all aged (65 and over)" or "aged (80 and over)"))

EMBASE (1974 to July 2014)(3847 hits)

1. amine/ae, dt, th [Adverse Drug Reaction, Drug Therapy, Therapy]
2. 4 aminobutyric acid/ae, dt [Adverse Drug Reaction, Drug Therapy]
3. cyclohexanecarboxylic acid derivative/ae, dt [Adverse Drug Reaction, Drug Therapy]
4. (gaba\* or neurontin\* or neurotonin\* or horizant\*).mp. [mp=title, abstract, subject headings, heading word, drug trade name, original title, device manufacturer, drug manufacturer, device trade name, keyword]
5. 1 or 2 or 3 or 4
6. exp pain/
7. pain\*.mp. [mp=title, abstract, subject headings, heading word, drug trade name, original title, device manufacturer, drug manufacturer, device trade name, keyword]
8. 6 or 7
9. 5 and 8
10. limit 9 to (human and (adult <18 to 64 years> or aged <65+ years>))

Science Citation Index Expanded (<http://apps.webofknowledge.com>)(1900 to July 2014)(4076 hits)

- #3 4,076 #2 AND #1  
 #2 417,945 TS=(pain\*)  
 #1 72,059 TS=(gaba\* or neurontin\* or neurotonin\* or horizant\*)

**Preliminary searches performed 14 November 2014**

Total number of references identified: 17315 references  
 Number of duplicates removed: 4105 references  
 Number of references in final list: 13210 references  
 Number of new references: 462 references

Batch name: 141114\_J Wetterslev\_GABA NEW

Cochrane Central Register of Controlled Trials (CENTRAL)(Issue 11 of 12, 2014) (2645 hits)

- #1 MeSH descriptor: [Amines] explode all trees and with qualifiers: [Adverse effects - AE, Therapeutic use - TU]
- #2 MeSH descriptor: [gamma-Aminobutyric Acid] explode all trees and with qualifiers: [Adverse effects - AE, Therapeutic use - TU]
- #3 MeSH descriptor: [Cyclohexanecarboxylic Acids] explode all trees and with qualifiers: [Adverse effects - AE, Therapeutic use - TU]
- #4 (gaba\* or neurontin\* or neurotonin\* or horizant\*)
- #5 #1 or #2 or #3 or #4

#6 MeSH descriptor: [Pain] explode all trees  
#7 pain\*  
#8 #6 or #7  
#9 #5 and #8  
#10 adult\* or middle age\* or aged  
#11 #9 and #10

MEDLINE (Ovid SP)(1946 to November 2014)(6549 hits)

1. exp Amines/ae, tu [Adverse Effects, Therapeutic Use]
2. exp gamma-Aminobutyric Acid/ae, tu [Adverse Effects, Therapeutic Use]
3. exp Cyclohexanecarboxylic Acids/ae, tu [Adverse Effects, Therapeutic Use]
4. (gaba\* or neurontin\* or neurotonin\* or horizant\*).mp. [mp=title, abstract, original title, name of substance word, subject heading word, keyword heading word, protocol supplementary concept, rare disease supplementary concept, unique identifier]
5. 1 or 2 or 3 or 4
6. exp Pain/
7. pain\*.mp. [mp=title, abstract, original title, name of substance word, subject heading word, keyword heading word, protocol supplementary concept, rare disease supplementary concept, unique identifier]
8. 6 or 7
9. 5 and 8
10. limit 9 to (humans and ("all adult (19 plus years)" or "young adult (19 to 24 years)" or "adult (19 to 44 years)" or "young adult and adult (19-24 and 19-44)" or "middle age (45 to 64 years)" or "middle aged (45 plus years)" or "all aged (65 and over)" or "aged (80 and over)"))

EMBASE (1974 to November 2014)(3962 hits)

1. amine/ae, dt, th [Adverse Drug Reaction, Drug Therapy, Therapy]
2. 4 aminobutyric acid/ae, dt [Adverse Drug Reaction, Drug Therapy]
3. cyclohexanecarboxylic acid derivative/ae, dt [Adverse Drug Reaction, Drug Therapy]
4. (gaba\* or neurontin\* or neurotonin\* or horizant\*).mp. [mp=title, abstract, subject headings, heading word, drug trade name, original title, device manufacturer, drug manufacturer, device trade name, keyword]
5. 1 or 2 or 3 or 4
6. exp pain/
7. pain\*.mp. [mp=title, abstract, subject headings, heading word, drug trade name, original title, device manufacturer, drug manufacturer, device trade name, keyword]
8. 6 or 7
9. 5 and 8
10. limit 9 to (human and (adult <18 to 64 years> or aged <65+ years>))

Science Citation Index Expanded (1900 to November 2014)(4159 hits)

#3 4,159 #2 AND #1  
#2 417,588 TS=(pain\*)  
#1 72,305 TS=(gaba\* or neurontin\* or neurotonin\* or horizant\*)

**Preliminary searches performed 9 April 2015**

Total number of references identified: 17466 references  
Number of duplicates removed: 4042 references  
Number of references in final list: 13424 references  
Number of new references: 126 references

Batch name: 150409\_J Wetterslev\_GABA

Cochrane Central Register of Controlled Trials (CENTRAL) (Issue 3 of 12, 2015) (2629 hits)

- #1 MeSH descriptor: [Amines] explode all trees and with qualifiers: [Adverse effects - AE, Therapeutic use - TU]
- #2 MeSH descriptor: [gamma-Aminobutyric Acid] explode all trees and with qualifiers: [Adverse effects - AE, Therapeutic use - TU]
- #3 MeSH descriptor: [Cyclohexanecarboxylic Acids] explode all trees and with qualifiers: [Adverse effects - AE, Therapeutic use - TU]
- #4 (gaba\* or neurontin\* or neurotonin\* or horizant\*)
- #5 #1 or #2 or #3 or #4
- #6 MeSH descriptor: [Pain] explode all trees
- #7 pain\*
- #8 #6 or #7
- #9 #5 and #8
- #10 adult\* or middle age\* or aged
- #11 #9 and #10

MEDLINE (Ovid SP)(1946 to April 2015) (6432 hits)

- 1. exp Amines/ae, tu [Adverse Effects, Therapeutic Use]
- 2. exp gamma-Aminobutyric Acid/ae, tu [Adverse Effects, Therapeutic Use]
- 3. exp Cyclohexanecarboxylic Acids/ae, tu [Adverse Effects, Therapeutic Use]
- 4. (gaba\* or neurontin\* or neurotonin\* or horizant\*).mp. [mp=title, abstract, original title, name of substance word, subject heading word, keyword heading word, protocol supplementary concept, rare disease supplementary concept, unique identifier]
- 5. 1 or 2 or 3 or 4
- 6. exp Pain/
- 7. pain\*.mp. [mp=title, abstract, original title, name of substance word, subject heading word, keyword heading word, protocol supplementary concept, rare disease supplementary concept, unique identifier]
- 8. 6 or 7
- 9. 5 and 8
- 10. limit 9 to (humans and ("all adult (19 plus years)" or "young adult (19 to 24 years)" or "adult (19 to 44 years)" or "young adult and adult (19-24 and 19-44)" or "middle age (45 to 64 years)" or "middle aged (45 plus years)" or "all aged (65 and over)" or "aged (80 and over)"))

EMBASE (1974 to April 2015) (4081 hits)

- 1. amine/ae, dt, th [Adverse Drug Reaction, Drug Therapy, Therapy]
- 2. 4 aminobutyric acid/ae, dt [Adverse Drug Reaction, Drug Therapy]
- 3. cyclohexanecarboxylic acid derivative/ae, dt [Adverse Drug Reaction, Drug Therapy]
- 4. (gaba\* or neurontin\* or neurotonin\* or horizant\*).mp. [mp=title, abstract, subject headings, heading word, drug trade name, original title, device manufacturer, drug manufacturer, device trade name, keyword]
- 5. 1 or 2 or 3 or 4
- 6. exp pain/
- 7. pain\*.mp. [mp=title, abstract, subject headings, heading word, drug trade name, original title, device manufacturer, drug manufacturer, device trade name, keyword]
- 8. 6 or 7
- 9. 5 and 8
- 10. limit 9 to (human and (adult <18 to 64 years> or aged <65+ years>))

Science Citation Index Expanded (1900 to April 2015) (4324 hits)

#3 4,324 #2 AND #1  
#2 430,421 TS=(pain\*)  
#1 73,791 TS=(gaba\* or neurontin\* or neurotonin\* or horizant\*)

### **Preliminary searches performed 23<sup>rd</sup> September 2015**

Total number of references identified: 18200 references  
Number of duplicates removed: 4184 references  
Number of references in final list: 14016 references  
Number of new references: 1188 references

Batch name: 150915\_J Wetterslev\_GABA

### Cochrane Central Register of Controlled Trials (CENTRAL) (Issue 8 of 12, 2015) (2798 hits)

#1 MeSH descriptor: [Amines] explode all trees and with qualifiers: [Adverse effects - AE, Therapeutic use - TU]  
#2 MeSH descriptor: [gamma-Aminobutyric Acid] explode all trees and with qualifiers: [Adverse effects - AE, Therapeutic use - TU]  
#3 MeSH descriptor: [Cyclohexanecarboxylic Acids] explode all trees and with qualifiers: [Adverse effects - AE, Therapeutic use - TU]  
#4 (gaba\* or neurontin\* or neurotonin\* or horizant\*)  
#5 #1 or #2 or #3 or #4  
#6 MeSH descriptor: [Pain] explode all trees  
#7 pain\*  
#8 #6 or #7  
#9 #5 and #8  
#10 adult\* or middle age\* or aged  
#11 #9 and #10

### MEDLINE (Ovid SP) (1946 to September 2015) (6621 hits)

1. exp Amines/ae, tu [Adverse Effects, Therapeutic Use]
2. exp gamma-Aminobutyric Acid/ae, tu [Adverse Effects, Therapeutic Use]
3. exp Cyclohexanecarboxylic Acids/ae, tu [Adverse Effects, Therapeutic Use]
4. (gaba\* or neurontin\* or neurotonin\* or horizant\*).mp. [mp=title, abstract, original title, name of substance word, subject heading word, keyword heading word, protocol supplementary concept, rare disease supplementary concept, unique identifier]
5. 1 or 2 or 3 or 4
6. exp Pain/
7. pain\*.mp. [mp=title, abstract, original title, name of substance word, subject heading word, keyword heading word, protocol supplementary concept, rare disease supplementary concept, unique identifier]
8. 6 or 7
9. 5 and 8
10. limit 9 to (humans and ("all adult (19 plus years)" or "young adult (19 to 24 years)" or "adult (19 to 44 years)" or "young adult and adult (19-24 and 19-44)" or "middle age (45 to 64 years)" or "middle aged (45 plus years)" or "all aged (65 and over)" or "aged (80 and over)"))

### EMBASE (1974 to September 2015) (4289 hits)

1. amine/ae, dt, th [Adverse Drug Reaction, Drug Therapy, Therapy]
2. 4 aminobutyric acid/ae, dt [Adverse Drug Reaction, Drug Therapy]
3. cyclohexanecarboxylic acid derivative/ae, dt [Adverse Drug Reaction, Drug Therapy]

4. (gaba\* or neurontin\* or neurotonin\* or horizant\*).mp. [mp=title, abstract, subject headings, heading word, drug trade name, original title, device manufacturer, drug manufacturer, device trade name, keyword]
5. 1 or 2 or 3 or 4
6. exp pain/
7. pain\*.mp. [mp=title, abstract, subject headings, heading word, drug trade name, original title, device manufacturer, drug manufacturer, device trade name, keyword]
8. 6 or 7
9. 5 and 8
10. limit 9 to (human and (adult <18 to 64 years> or aged <65+ years>))

Science Citation Index Expanded (1900 to September 2015) (4492 hits)

#3 4,492 #2 AND #1

#2 445,898 TS=(pain\*)

#1 75,431 TS=(gaba\* or neurontin\* or neurotonin\* or horizant\*)

**Preliminary searches performed 12<sup>th</sup> April 2016**

|                                        |            |
|----------------------------------------|------------|
| Total number of references identified: | references |
| Number of duplicates removed:          | references |
| Number of references in final list:    | references |
| Number of new references:              | references |

Batch name: 160412\_J Wetterslev\_GABA

Cochrane Central Register of Controlled Trials (CENTRAL) (Issue 4 of 12, 2015) (2993 hits)

- #1 MeSH descriptor: [Amines] explode all trees and with qualifiers: [Adverse effects - AE, Therapeutic use - TU]
- #2 MeSH descriptor: [gamma-Aminobutyric Acid] explode all trees and with qualifiers: [Adverse effects - AE, Therapeutic use - TU]
- #3 MeSH descriptor: [Cyclohexanecarboxylic Acids] explode all trees and with qualifiers: [Adverse effects - AE, Therapeutic use - TU]
- #4 (gaba\* or neurontin\* or neurotonin\* or horizant\*)
- #5 #1 or #2 or #3 or #4
- #6 MeSH descriptor: [Pain] explode all trees
- #7 pain\*
- #8 #6 or #7
- #9 #5 and #8
- #10 adult\* or middle age\* or aged
- #11 #9 and #10

MEDLINE (Ovid SP) (1946 to April 2016) (6625 hits)

1. exp Amines/ae, tu [Adverse Effects, Therapeutic Use]
2. exp gamma-Aminobutyric Acid/ae, tu [Adverse Effects, Therapeutic Use]
3. exp Cyclohexanecarboxylic Acids/ae, tu [Adverse Effects, Therapeutic Use]
4. (gaba\* or neurontin\* or neurotonin\* or horizant\*).mp. [mp=title, abstract, original title, name of substance word, subject heading word, keyword heading word, protocol supplementary concept, rare disease supplementary concept, unique identifier]
5. 1 or 2 or 3 or 4
6. exp Pain/
7. pain\*.mp. [mp=title, abstract, original title, name of substance word, subject heading word, keyword heading word, protocol supplementary concept, rare disease supplementary concept, unique identifier]

8. 6 or 7

9. 5 and 8

10. limit 9 to (humans and ("all adult (19 plus years)" or "young adult (19 to 24 years)" or "adult (19 to 44 years)" or "young adult and adult (19-24 and 19-44)" or "middle age (45 to 64 years)" or "middle aged (45 plus years)" or "all aged (65 and over)" or "aged (80 and over)"))

#### EMBASE (1974 to April 2016) (4474 hits)

1. amine/ae, dt, th [Adverse Drug Reaction, Drug Therapy, Therapy]

2. 4 aminobutyric acid/ae, dt [Adverse Drug Reaction, Drug Therapy]

3. cyclohexanecarboxylic acid derivative/ae, dt [Adverse Drug Reaction, Drug Therapy]

4. (gaba\* or neurontin\* or neurotonin\* or horizant\*).mp. [mp=title, abstract, subject headings, heading word, drug trade name, original title, device manufacturer, drug manufacturer, device trade name, keyword]

5. 1 or 2 or 3 or 4

6. exp pain/

7. pain\*.mp. [mp=title, abstract, subject headings, heading word, drug trade name, original title, device manufacturer, drug manufacturer, device trade name, keyword]

8. 6 or 7

9. 5 and 8

10. limit 9 to (human and (adult <18 to 64 years> or aged <65+ years>))

#### Science Citation Index Expanded (1900 to April 2016) (4717 hits)

#3 #2 AND #1

#2 TS=(pain\*)

#1 TS=(gaba\* or neurontin\* or neurotonin\* or horizant\*)

### **Google Scholar search**

#### After the 1st search, 13th November 2013

Gabapentin AND Postoperative pain

Gabapentin AND Acute pain management

Gabapentin AND Perioperative pain management

#### After the 2nd search, 30th June 2014

Gabapentin AND Postoperative pain

Gabapentin AND Acute pain management

Gabapentin AND Perioperative pain management

Limits: titles from 1<sup>st</sup> November 2013 and on

#### After the 3rd search, 14th November 2014

Gabapentin AND Postoperative pain

Gabapentin AND Acute pain management

Gabapentin AND Perioperative pain management

Limits: titles from 1<sup>st</sup> June 2014 and on

#### After the 4th search, 9th April 2015

Gabapentin AND Postoperative pain

Gabapentin AND Acute pain management

Gabapentin AND Perioperative pain management



Limits: titles from 1<sup>st</sup> November 2014 and on

After the 5th search, 23rd September 2015

Gabapentin AND Postoperative pain

Gabapentin AND Acute pain management

Gabapentin AND Perioperative pain management

Limits: titles from 1<sup>st</sup> April 2015 and on

After the 6th search, 12<sup>th</sup> April 2016

Gabapentin AND Postoperative pain

Gabapentin AND Acute pain management

Gabapentin AND Perioperative pain management

Limits: titles from 1<sup>st</sup> September 2015 and on

Supplemental Digital Content 2 Opioid conversion

| <b>Opioid</b>             | <b>Administration</b> | <b>Opioid: Intravenous morphine</b> |
|---------------------------|-----------------------|-------------------------------------|
| 1 mg Fentanyl             | i.v.                  | 100 mg morphine                     |
| 1 mg Hydromorphone        | i.v.                  | 5 mg morphine                       |
| 1 mg Morphine oral        | oral                  | 0.33 mg morphine                    |
| 1 mg Nalbuphine           | i.v.                  | 1 mg morphine                       |
| 1 mg Pethidine/Meperidine | i.v.                  | 0.13 mg morphine                    |
| 1 mg Propoxyphene         | i.v.                  | 5 mg morphine                       |
| 1 mg Tramadol oral        | oral                  | 0.07 mg morphine                    |

Supplemental Digital Content 3 Trial characteristics

| Trial                         | No* of patients | Surgical Procedures                             | Dose<br><i>mg/day</i><br><i>(bolus mg)</i> | Treatment<br><i>Single /</i><br><i>Multiple dose</i> | Total 24-hour morphine consumption<br><i>Intra venous morphine (mg)</i> |                                  |
|-------------------------------|-----------------|-------------------------------------------------|--------------------------------------------|------------------------------------------------------|-------------------------------------------------------------------------|----------------------------------|
|                               |                 |                                                 |                                            |                                                      | Intervention (mg)<br><i>(Mean SD)</i>                                   | Control (mg)<br><i>(Mean SD)</i> |
| Amr 2009 <sup>32</sup>        | 100             | Radical or partial mastectomy                   | 300 mg/day<br>(300 mg)                     | Multiple dose                                        | 13.5 (0.5)                                                              | 22.0 (2.1)                       |
| Bang 2009 <sup>36</sup>       | 46              | Arthroscopic shoulder surgery                   | 300 mg/day                                 | Single dose                                          | 32.1 (29.1)                                                             | 30.1 (28.67)                     |
| Behdad 2012 <sup>39</sup>     | 61              | Hysterectomy                                    | 300 mg/day<br>(100 mg)                     | Multiple dose                                        | -                                                                       | -                                |
| Chowdhury 2010 <sup>46</sup>  | 200             | Gynecological surgery                           | 300 mg/day                                 | Single dose                                          | -                                                                       | -                                |
| Clarke 2014 <sup>48</sup>     | 179             | Total knee arthroplasty                         | 200 mg /day<br>(600 mg)                    | Multiple dose                                        | 37 (1.5)                                                                | 48 (1.3)                         |
| Ghafari 2009 <sup>60</sup>    | 66              | Abdominal hysterectomy and salphingooophrectomy | 300 mg/day<br>(300 mg)                     | Multiple dose                                        | 15.8 (1.2)                                                              | 26.9 (2.3)                       |
| Hassani 2014 <sup>67</sup>    | 60              | Laparoscopic gastric by-pass                    | 100 mg/day                                 | Single dose                                          | -                                                                       | -                                |
| Khurana 2013 <sup>77</sup>    | 60              | Lumbar discectomy                               | 300 mg/day<br>(300 mg)                     | Multiple dose                                        | -                                                                       | -                                |
| Mohammadi 2008 <sup>95</sup>  | 70              | Assisted reproductive techniques                | 300 mg/day                                 | Single dose                                          | -                                                                       | -                                |
| Mohammadi 2009 <sup>96</sup>  | 80              | Abdominal surgery/gynecological surgery         | 300 mg/day                                 | Single dose                                          | -                                                                       | -                                |
| Lichtinger 2011 <sup>84</sup> | 40              | Bilateral photorefractive keratectomy           | 300 mg/day<br>(600 mg)                     | Multiple dose                                        | -                                                                       | -                                |
| Pandey 2004c <sup>107</sup>   | 56              | Single level lumbar disc surgery                | 300 mg/day                                 | Single dose                                          | 90.9 (34.1)                                                             | 92.5 (41.8)                      |
| Ray 2015 <sup>118</sup>       | 60              | Abdominal hysterectomy                          | 300 mg/day                                 | Single dose                                          | -                                                                       | -                                |
| Sekhabet 2009 <sup>123</sup>  | 98              | Abdominal hysterectomy                          | 300 mg /day<br>(600 mg)                    | Multiple dose                                        | 40.1 (14.5)                                                             | 52.7 (21.1)                      |
| Spence 2011 <sup>131</sup>    | 57              | Shoulder arthroscopy                            | 300mg/day<br>(300 mg)                      | Multiple dose                                        | -                                                                       | -                                |
| Vahedi 2011 <sup>140</sup>    | 76              | Lumbar laminectomy and discectomy               | 300 mg/day                                 | Single dose                                          | 18.6 (9.0)                                                              | 21.5 (11.3)                      |

|                                 |     |                                                            |                        |               |             |             |
|---------------------------------|-----|------------------------------------------------------------|------------------------|---------------|-------------|-------------|
| Vasigh 2016 <sup>141</sup>      | 76  | Laminectomy                                                | 300 mg/day<br>(600 mg) | Multiple dose | -           | -           |
| Verma 2008 <sup>142</sup>       | 50  | Abdominal hysterectomy                                     | 300 mg/day             | Single dose   | -           | -           |
| Waikakul 2011 <sup>144</sup>    | 48  | Spine, major joint, tumor and major limb surgery           | 300 mg/day<br>(400 mg) | Multiple dose | 15.5 (9.3)  | 18 (15.5)   |
| Yoon 2001 <sup>145</sup>        | 32  | Hysterectomy                                               | 300 mg/day<br>(400 mg) | Multiple dose | 24.1 (9.9)  | 32.7 (14.6) |
| Ajori 2011 <sup>30</sup>        | 138 | Abdominal hysterectomy                                     | 600 mg/day             | Single dose   | -           | -           |
| Azemati 2013 <sup>33</sup>      | 100 | Mastectomy or quandractomy and axillary node dissection    | 600 mg/day             | Single dose   | -           | -           |
| Bafna 2014 <sup>143</sup>       | 60  | Gynecological surgery                                      | 600 mg/day             | Single dose   | -           | -           |
| Bashir 2009 <sup>38</sup>       | 100 | Laparoscopic cholecystectomy                               | 600 mg/day             | Single dose   | -           | -           |
| Bhandari 2014 <sup>41</sup>     | 40  | Laparoscopic cholecystectomy                               | 600 mg/day<br>(600 mg) | Multiple dose | -           | -           |
| Bharti 2012 <sup>42</sup>       | 40  | Total mastectomy with axillary node dissection             | 600 mg/day             | Single dose   | 2.1 (2.2)   | 4.9 (3.4)   |
| Celebi 2013 <sup>45</sup>       | 60  | Gynecological laparoscopy                                  | 600 mg/day             | Single dose   | -           | -           |
| Clarke 2009b <sup>147</sup>     | 115 | Total hip arthroplasty                                     | 600 mg/day             | Single dose   | 37.0 (1.5)  | 48 (1.3)    |
| Ercan 2014 <sup>54</sup>        | 34  | Carotid Endartectomy                                       | 600 mg/day             | Single dose   | -           | -           |
| Gosai 2015 <sup>64</sup>        | 60  | Mastectomy                                                 | 600 mg/day             | Single dose   | -           | -           |
| Grover 2009 <sup>66</sup>       | 46  | Total mastectomy with axillary node dissection             | 600 mg/day             | Single dose   | -           | -           |
| Hoseini 2015 <sup>68</sup>      | 44  | Cholecystectomy                                            | 600 mg/day             | Single dose   | -           | -           |
| Joseph 2014 <sup>71</sup>       | 50  | Abdominal hysterectomy                                     | 600 mg/day<br>(600 mg) | Multiple dose | 38.7 (18.0) | 44.3 (16.0) |
| Kavitha 2013 <sup>72</sup>      | 56  | Intraocular surgery/cataract                               | 600 mg/day             | Single dose   | -           | -           |
| Kazak 2009 <sup>73</sup>        | 60  | Nasal septal, nasal sinus surgery                          | 600 mg/day             | Single dose   | -           | -           |
| Khademi 2009 <sup>74</sup>      | 87  | Open cholecystectomy                                       | 600 mg/day             | Single dose   | 2.8 (1.3)   | 3.5 (1.5)   |
| Khezri 2013 <sup>76</sup>       | 80  | Cataract surgery                                           | 600 mg/day             | Single dose   | -           | -           |
| Kinney 2011 <sup>79</sup>       | 125 | Thoractomy; lobectomy; pneumonectomy; chest wall resection | 600 mg/day             | Single dose   | -           | -           |
| Manhoori 2014 <sup>85</sup>     | 50  | Unilateral herniorrhaphy                                   | 400 mg/day             | Single dose   | -           | -           |
| Maleh 2013 <sup>86</sup>        | 80  | Laparoscopic surgery                                       | 600 mg/day             | Single dose   | 2.5 (2.6)   | 2.7 (2.7)   |
| Mardani-Kivi 2013 <sup>88</sup> | 108 | Anterior Collateral Ligament reconstruction                | 600 mg/day             | Single dose   | 2.5 (2.3)   | 3.7 (2.5)   |

|                                      |     |                                                       |                      |               |             |             |
|--------------------------------------|-----|-------------------------------------------------------|----------------------|---------------|-------------|-------------|
| Menda 2010 <sup>89</sup>             | 60  | Coronary Artery Bypass Graft                          | 600 mg/day           | Single dose   | 6.0 (8.5)   | 15.1 (20)   |
| Metry 2008 <sup>91</sup>             | 68  | Unilateral radical mastectomy and axillary dissection | 600 mg/day (1200 mg) | Single dose   | 16.1 (7.7)  | 29.2 (9.6)  |
| Misra 2013 <sup>94</sup>             | 73  | Craniotomy for intracranial tumor                     | 600 mg/day           | Single dose   | 24.6 (19.6) | 29.2 (25.2) |
| Monks 2015 <sup>98</sup>             | 197 | Cesarean section                                      | 600 mg/day (600 mg)  | Multiple dose | 10.0 (11.9) | 10.0 (7.4)  |
| Moore 2010 <sup>99</sup>             | 44  | Cesarean section                                      | 600 mg/day           | Single dose   | 3.0 (3.0)   | 4.0 (5.0)   |
| Özcan 2011 <sup>102</sup>            | 40  | Supratentorial tumor surgery                          | 600 mg/day           | Single dose   | 15.0 (5.0)  | 19.0 (4.2)  |
| Pandey 2005 <sup>108</sup>           | 60  | Open donor nephrectomy                                | 600 mg/day           | Single dose   | 59.4 (23.2) | 92.5 (41.8) |
| Pandey 2006 <sup>105</sup>           | 250 | Laparoscopic cholecystectomy                          | 600 mg/day           | Single dose   | 39.2 (26.3) | 67.7 (25.3) |
| Parikh 2010 <sup>109</sup>           | 60  | Elective surgery                                      | 600 mg/day           | Single dose   | 31.7 (20.3) | 31.9 (19.8) |
| Paul 2013 <sup>111</sup>             | 101 | Total knee arthroplasty                               | 600 mg/day (200 mg)  | Multiple dose | 27.9 (23.0) | 26.8 (19.0) |
| Paul 2015 <sup>112</sup>             | 102 | Total hip arthroplasty                                | 600 mg/day (600 mg)  | Multiple dose | 19.7 (16.4) | 25.1 (14.5) |
| Saeed 2013 <sup>121</sup>            | 100 | Laparoscopic cholecystectomy                          | 600 mg/day           | Single dose   | -           | -           |
| Sava 2009 <sup>122</sup>             | 50  | Colorectal surgery                                    | 600 mg/day           | Single dose   | 35.6 (14.1) | 54.7 (13.0) |
| Semira 2013 <sup>124</sup>           | 60  | Laparoscopic cholecystectomy                          | 600 mg/day           | Single dose   | -           | -           |
| Sharma 2015 <sup>127</sup>           | 40  | Laparoscopic cholecystectomy                          | 600 mg/day (600 mg)  | Multiple dose | -           | -           |
| Short 2012 <sup>9</sup>              | 63  | Cesarean section                                      | 300 mg               | Single dose   | 5.7 (5.3)   | 7.9 (3.8)   |
| Siddiqui 2013 <sup>129</sup>         | 72  | Major bowel surgery                                   | 600 mg/day           | Single dose   | -           | -           |
| Soltanzadeh 2011 <sup>130</sup>      | 60  | Coronary Artery Bypass Grafting                       | 400 mg/day (800 mg)  | Multiple dose | 2.5 (0.9)   | 4.0 (1.5)   |
| Srivastava 2009 <sup>132</sup>       | 120 | Open cholecystectomy                                  | 600 mg/day           | Single dose   | 25.4 (4.5)  | 37.6 (8.4)  |
| Zaldivar-Ramirez 2011 <sup>146</sup> | 34  | Nissen laparoscopic fund-operation                    | 600 mg/day (300 mg)  | Multiple dose | -           | -           |
| Adam 2006 <sup>29</sup>              | 53  | Arthroscopic shoulder surgery                         | 800 mg/day           | Single dose   | -           | -           |
| Badawy 2014 <sup>34</sup>            | 40  | Abdominal hysterectomy                                | 800 mg/day           | Single dose   | 11.5 (2.3)  | 13.0 (2.9)  |
| Deniz 2012 <sup>49</sup>             | 51  | Radical Retropubic Prostatectomy                      | 900 mg/day           | Single dose   | 22.2 (11.9) | 25.6 (10.5) |
| Farzi 2015 <sup>55</sup>             | 103 | Septorhinoplasty                                      | 900 mg/day           | Single dose   | -           | -           |
| Ghai 2011 <sup>61</sup>              | 60  | Abdominal hysterectomy                                | 900 mg/day           | Single dose   | 5.4 (1.6)   | 4.3 (1.9)   |
| Ghai 2012 <sup>62</sup>              | 60  | Abdominal hysterectomy                                | 900 mg/day           | Single dose   | -           | -           |

|                                      |     |                                                           |                          |               |             |             |
|--------------------------------------|-----|-----------------------------------------------------------|--------------------------|---------------|-------------|-------------|
| Kuhnle 2010 <sup>82</sup>            | 82  | PRK Myopia surgery                                        | 900 mg /day<br>(300 mg)  | Multiple dose | -           | -           |
| Kim 2004 <sup>78</sup>               | 41  | Mastectomy                                                | 900 mg/day               | Single dose   | 35.8 (20.8) | 33.5 (26.1) |
| Koc 2007 <sup>80</sup>               | 40  | Varicocele                                                | 800 mg/day               | Single dose   | -           | -           |
| Leung 2006 <sup>83</sup>             | 21  | Spine surgery                                             | 900 mg/day<br>(900 mg)   | Multiple dose | -           | -           |
| Lunn 2015 <sup>5</sup>               | 140 | Total knee arthroplasty                                   | 900 mg/day               | Multiple dose | 45.4 (35.7) | 50.5 (41.4) |
| Marashi 2012 <sup>87</sup>           | 44  | Thyroidectomy                                             | 900 mg/day               | Single dose   | 18.3 (15.6) | 65.7 (31.0) |
| Mishra 2016 <sup>93</sup>            | 60  | Laparoscopic cholecystectomy                              | 900 mg/day               | Single dose   | -           | -           |
| Neogi 2012 <sup>100</sup>            | 60  | Laparoscopic cholecystectomy                              | 900 mg/day               | Single dose   | -           | -           |
| Pakravan 2012 <sup>104</sup>         | 100 | Post photorefractive keratectomy surgery                  | 900 mg/day<br>(300 mg)   | Multiple dose | -           | -           |
| Prabhakar 2007 <sup>113</sup>        | 20  | Elective brachial plexus exploration                      | 800 mg/day               | Single dose   | 23.8 (5.0)  | 20.0 (2.1)  |
| Radhakrishnan<br>2005 <sup>114</sup> | 30  | Lumbar laminectomy or lumbar discectomy                   | 800 mg/day<br>(400 mg)   | Multiple dose | -           | -           |
| Rajendran 2014 <sup>116</sup>        | 60  | Small gastrointestinal procedures                         | 900 mg/day               | Single dose   | -           | -           |
| Ram 2015 <sup>115</sup>              | 60  | Abdominal hysterectomy                                    | 900 mg/day               | Single dose   | -           | -           |
| Rimaz 2014 <sup>119</sup>            | 60  | Dacryocystorhinostomy                                     | 900 mg/day               | Single dose   | -           | -           |
| Short 2012a <sup>9</sup>             | 63  | Cesarean section                                          | 600 mg                   | Single dose   | 6.7 (3.6)   | 7.9 (3.8)   |
| Abdelmageed<br>2010 <sup>28</sup>    | 60  | Tonsillectomy                                             | 1200 mg/day              | Single dose   | 6.6 (1.3)   | 12.2 (1.1)  |
| Al-Mujadi 2005 <sup>31</sup>         | 72  | Elective thyroid surgery                                  | 1200 mg/day              | Single dose   | 15.2 (7.6)  | 29.5 (9)    |
| Bartholdy 2006 <sup>37</sup>         | 76  | Sterilization laparoscopic with Filshie clips             | 1200 mg/day              | Single dose   | -           | -           |
| Bakry 2011 <sup>35</sup>             | 60  | Cataract surgery                                          | 1200 mg/day              | Single dose   | -           | -           |
| Bekawi 2014 <sup>40</sup>            | 60  | Laparoscopic cholecystectomy                              | 1200 mg/day<br>(1200 mg) | Multiple dose | 0 (2.2)     | 7.5 (0.7)   |
| Brogly 2008 <sup>43</sup>            | 43  | Total or partial thyroidectomy                            | 1200 mg/day              | Single dose   | 0 (1.48)    | 0 (4.4)     |
| Butt 2010 <sup>44</sup>              | 100 | Mastectomy                                                | 1200 mg/day              | Single dose   | -           | -           |
| Clarke 2013 <sup>47</sup>            | 44  | General-, gynecological-, plastic and ENT surgery         | 1200 mg/day              | Single dose   | -           | -           |
| Dierking 2003 <sup>50</sup>          | 80  | Abdominal hysterectomy and<br>salphingoophrectomy         | 2400 mg/day<br>(600 mg)  | Multiple dose | 43.0 (23.7) | 63.0 (25.9) |
| Dirks 2002 <sup>51</sup>             | 65  | Unilateral radical mastectomy with axillary<br>dissection | 1200 mg/day              | Single dose   | -           | -           |

|                                |     |                                                                          |                       |               |             |              |
|--------------------------------|-----|--------------------------------------------------------------------------|-----------------------|---------------|-------------|--------------|
| Doha 2010 <sup>52</sup>        | 59  | Radical Mastectomy                                                       | 1200 mg/day           | Single dose   | 39.9 (33.0) | 42.7 (36.1)  |
| Durmus 2006 <sup>53</sup>      | 50  | Total abdominal hysterectomy                                             | 1200 mg/day           | Single dose   | 40.0 (10.0) | 66.0 (10.0)  |
| Fassoulaki 2002 <sup>57</sup>  | 50  | Radical mastectomy or lobectomy with axillary node dissection            | 1200 mg/day (1200 mg) | Multiple dose | 23.8 (5.0)  | 23.2 (5.8)   |
| Fassoulaki 2005 <sup>58</sup>  | 59  | Abdominal hysterectomy                                                   | 1600 mg/day<br>400 mg | Multiple dose | 20.3 (7.9)  | 25.7 (11.2)  |
| Fassoulaki 2006 <sup>56</sup>  | 60  | Abdominal hysterectomy                                                   | 1600 mg/day<br>800 mg | Multiple dose | 22.0 (2.9)  | 35.0 (4.8)   |
| Frouzanfard 2013 <sup>59</sup> | 50  | Abdominal hysterectomy                                                   | 1200 mg/day           | Single dose   | 1.2 (0.2)   | 5.2 (2.8)    |
| Gilron 2004 <sup>63</sup>      | 47  | Abdominal hysterectomy                                                   | 1800 mg/day<br>600 mg | Multiple dose | 56.8 (32.4) | 82.1 (48.2)  |
| Grosen 2014 <sup>65</sup>      | 104 | Thoracotomy for malignancy                                               | 1200 mg/day (1200 mg) | Multiple dose | 11.2 (21.6) | 17.9 (23.69) |
| Hout 2007 <sup>69</sup>        | 51  | Exploratory thoracotomy, pneumonectomy, lobectomy, segmentectomy, biopsy | 1200 mg/day           | Single dose   | 2.4 (2.5)   | 2.7 (3.2)    |
| Jajeda 2014 <sup>70</sup>      | 50  | Upper abdominal surgery                                                  | 1200 mg/day           | Single dose   | -           | -            |
| Khan 2013 <sup>75</sup>        | 69  | Abdominal hysterectomy                                                   | 1200 mg/day           | Single dose   | 13.1 (4.7)  | 24.3 (9.3)   |
| Kosucu 2013 <sup>81</sup>      | 60  | Posterolateral or lateral thoracotomy                                    | 1200 mg/day           | Single dose   | 25.9 (8.3)  | 44.0 (11.0)  |
| Lunn 2015a <sup>5</sup>        | 141 | Total knee arthroplasty                                                  | 1300 mg/day           | Multiple dose | 46.2 (41.0) | 50.5 (41.4)  |
| Ménigaux 2004 <sup>90</sup>    | 40  | Arthroscopic anterior cruciate ligament                                  | 1200 mg/day           | Single dose   | 21.0 (12.0) | 20.0 (19.0)  |
| Mikkelsen 2006 <sup>92</sup>   | 51  | Tonsillectomy                                                            | 1800 mg/day (1200 mg) | Multiple dose | -           | -            |
| Mohammed 2012 <sup>97</sup>    | 80  | Functional endoscopic sinus surgery                                      | 1200 mg/day           | Single dose   | -           | -            |
| Omran 2005 <sup>101</sup>      | 50  | Posterolateral thoracotomy for lobectomy                                 | 1200 mg/day (1200 mg) | Multiple dose | 23.9 (2.6)  | 31.5 (2.8)   |
| Özgenzil 2011 <sup>103</sup>   | 60  | Decompressive lumbar laminectomy and discectomy                          | 1800 mg/day<br>600 mg | Multiple dose | 29.5 (9.6)  | 37.3 (9.5)   |
| Pathak 2014 <sup>110</sup>     | 80  | Cholecystectomy                                                          | 1200 mg/day           | Single dose   | -           | -            |
| Rapchuk 2009 <sup>117</sup>    | 54  | Cardiac surgery                                                          | 1200 mg/day           | Single dose   | -           | -            |
| Rorarius 2004 <sup>102</sup>   | 90  | Vaginal hysterectomy                                                     | 1200 mg/day           | Single dose   | -           | -            |
| Sen 2009a <sup>125</sup>       | 40  | Abdominal hysterectomy and salphingoophrectomy                           | 1200 mg/day           | Single dose   | 31.0 (12.0) | 48.0 (17.0)  |
| Sen 2009b <sup>126</sup>       | 59  | Unilateral inguinal herniotomy                                           | 1200 mg/day           | Single dose   | 20.0 (11.5) | 28.0 (11.5)  |

|                             |     |                                                                      |                       |               |             |             |
|-----------------------------|-----|----------------------------------------------------------------------|-----------------------|---------------|-------------|-------------|
| Sheen 2008 <sup>128</sup>   | 80  | Orthopedic surgeries                                                 | 1200 mg/day           | Single dose   | -           | -           |
| Syal 2010 <sup>133</sup>    | 60  | Open cholecystectomy                                                 | 1200 mg/day           | Single dose   | 40.2 (35.2) | 46.7 (35.8) |
| Tirault 2010 <sup>134</sup> | 135 | Ear-nose and throat-, general-, orthopedic-, and gynecologic surgery | 1200 mg/day           | Single dose   | -           | -           |
| Turan 2003a <sup>12</sup>   | 50  | Abdominal hysterectomy and salphingoophrectomy                       | 1200 mg/day           | Single dose   | 27.0 (14.4) | 42.0 (8.4)  |
| Turan 2003b <sup>135</sup>  | 50  | Discectomy spinal fusion surgery                                     | 1200 mg/day           | Single dose   | 16.3 (8.9)  | 42.8 (10.9) |
| Turan 2004 <sup>137</sup>   | 50  | Ear Nose and Throat surgery                                          | 1200 mg/day           | Single dose   | -           | -           |
| Turan 2005 <sup>136</sup>   | 40  | Lower limb surgery                                                   | 1200 mg/day (1200 mg) | Multiple dose | -           | -           |
| Turan 2006 <sup>138</sup>   | 50  | Abdominal hysterectomy and salphingoophrectomy                       | 1200 mg/day (1200 mg) | Multiple dose | -           | -           |
| Ucak 2011 <sup>139</sup>    | 40  | Coronary Artery Bypass Graft                                         | 1200 mg/day (1200 mg) | Multiple dose | 9.9 (5.4)   | 14.9 (7.3)  |



Supplemental Digital Content 4: Bias evaluations

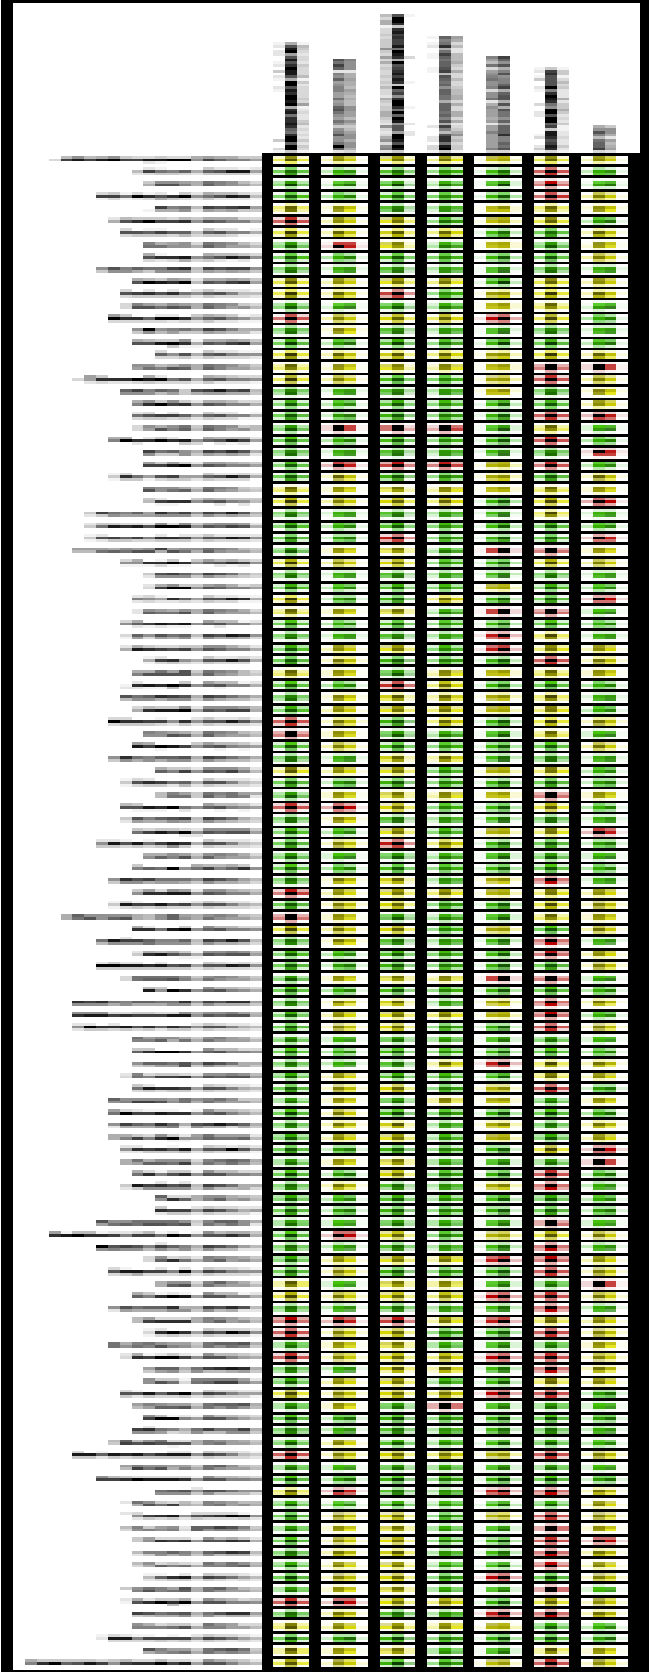

## Supplemental Digital Content 5 Forest plot of VAS 6h rest from trials with low risk of bias

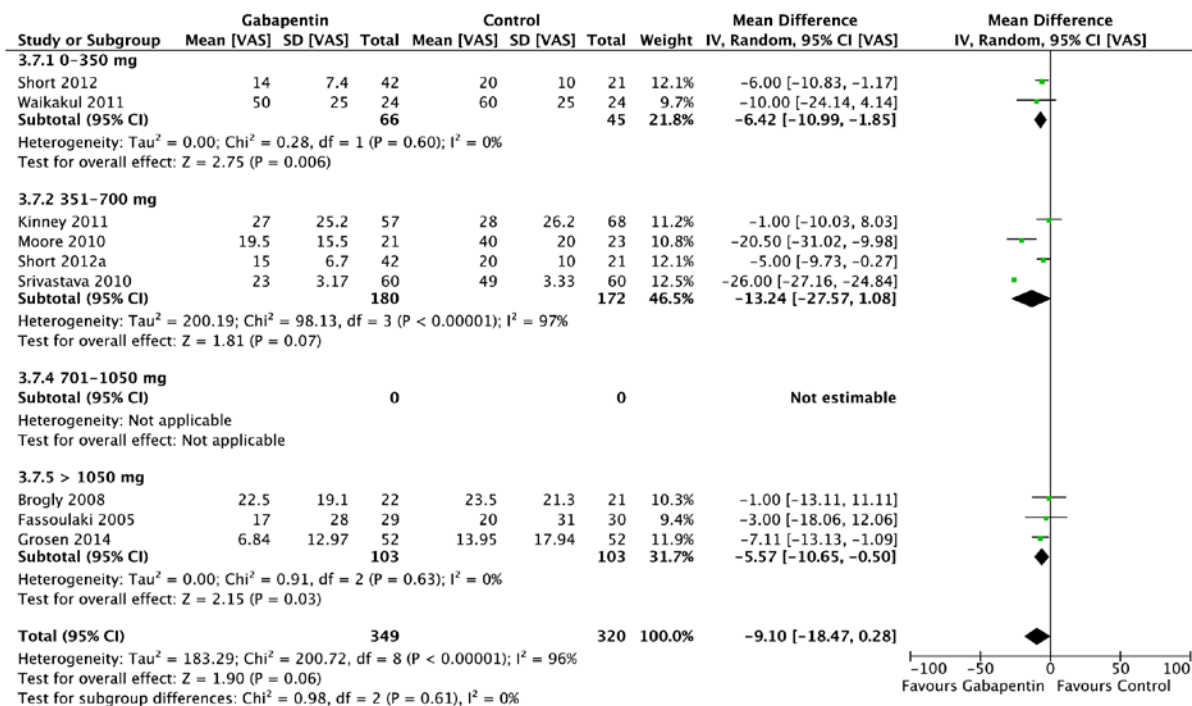

## Supplemental Digital Content 6 Forest plot of VAS 6h rest from all trials estimates

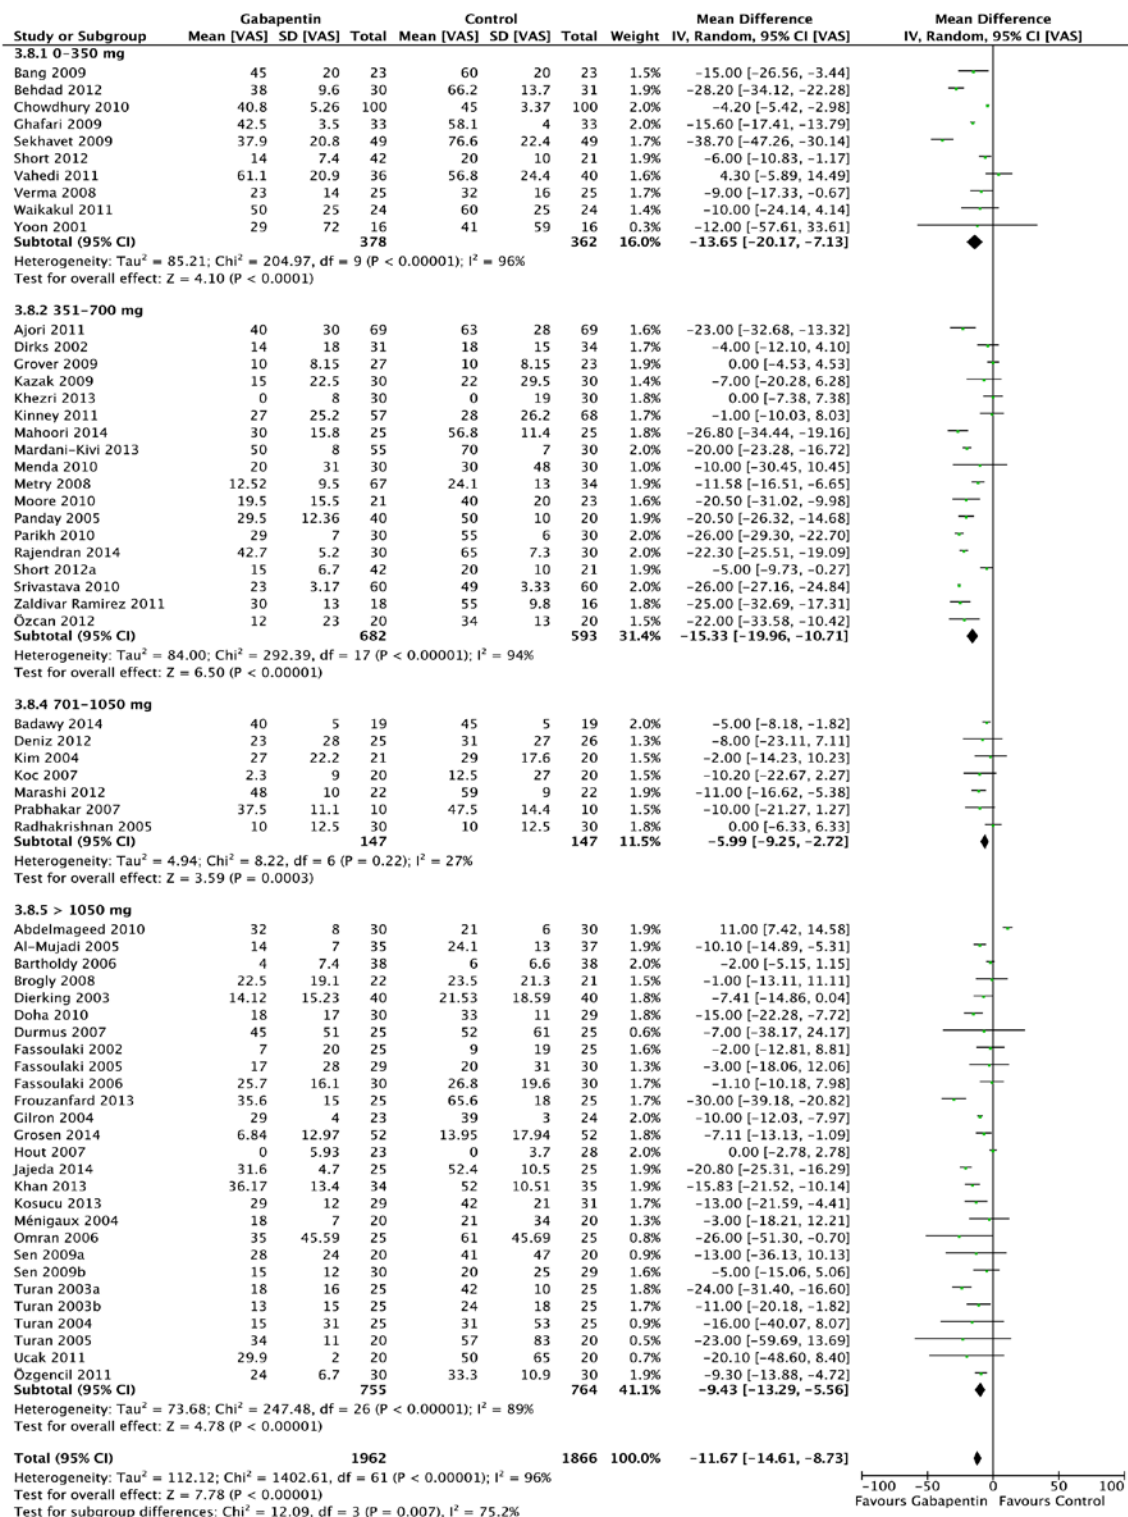

Supplemental Digital Content 7 Forest plot of VAS 6h mobilization from trials with low risk of bias

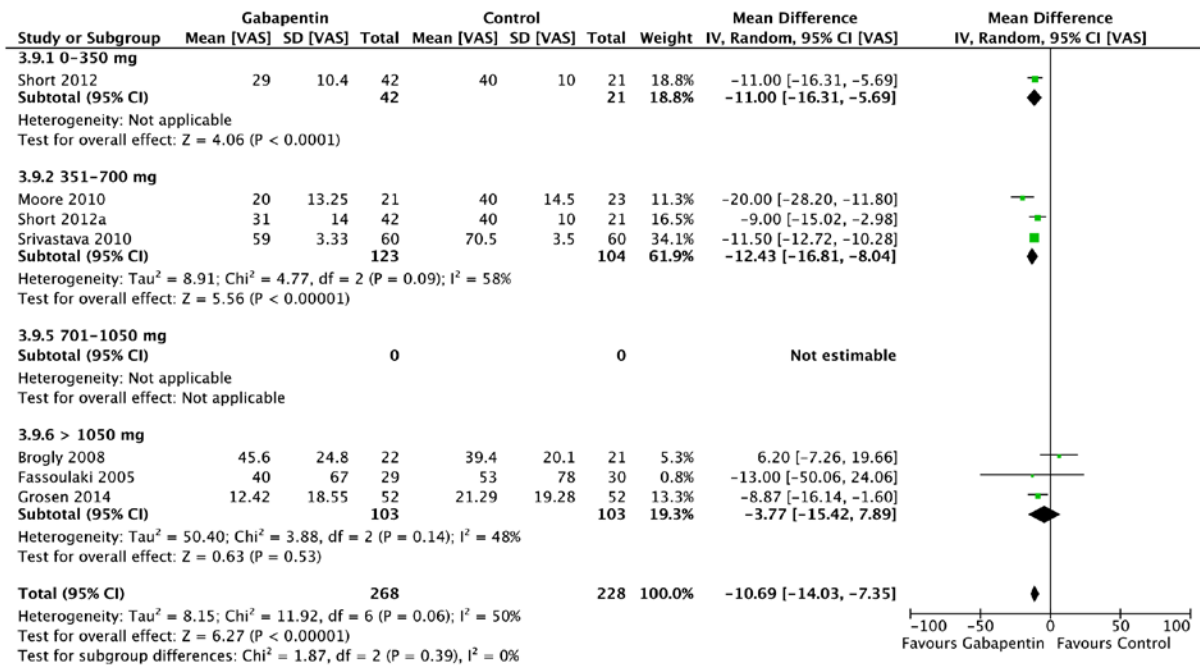

## Supplemental Digital Content 8 Forest plot of VAS 6h mobilization from all trials estimates

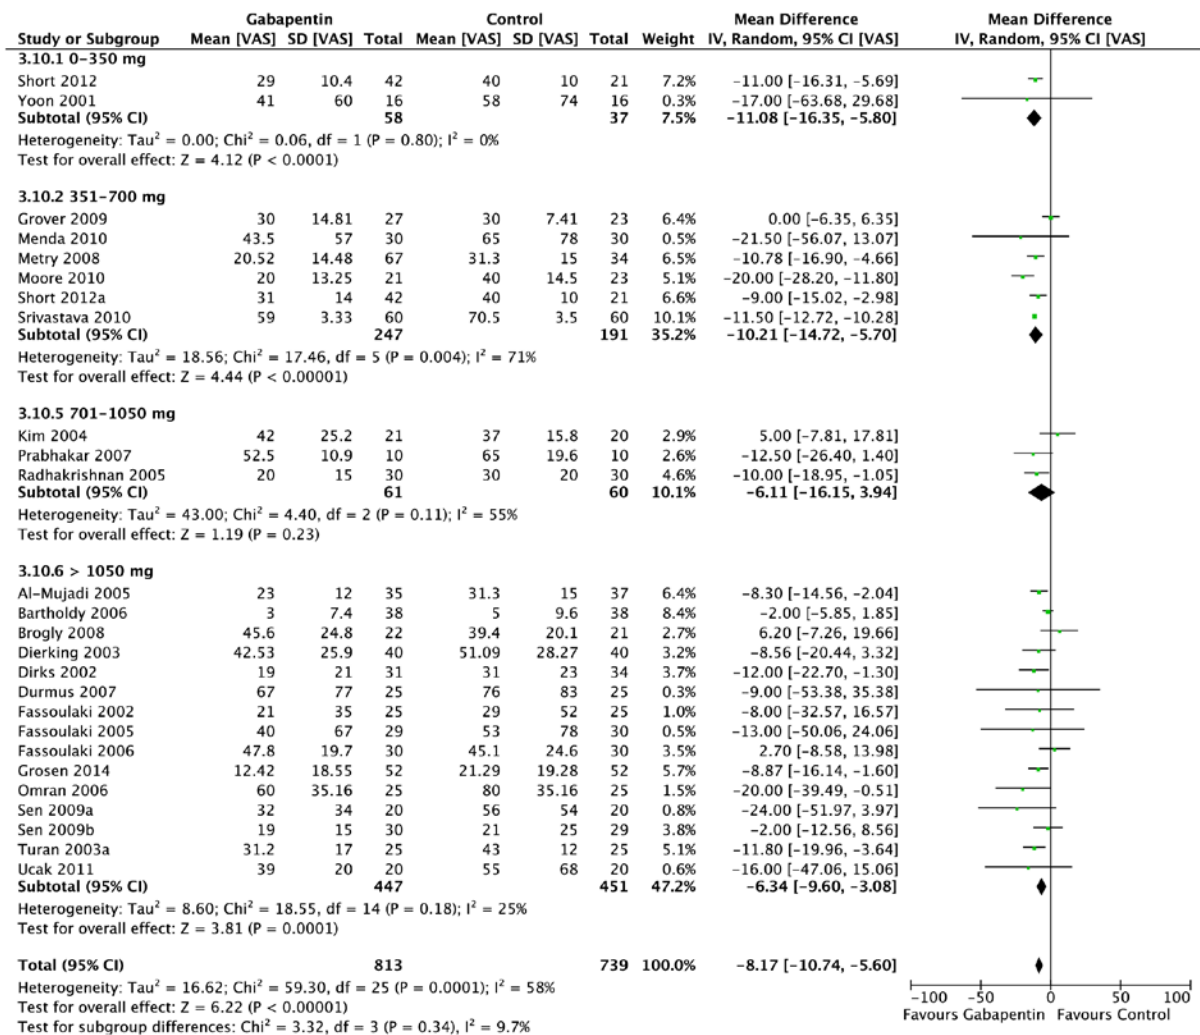

Supplemental Digital Content 9 Forest plot of VAS 24h rest from trials with low risk of bias

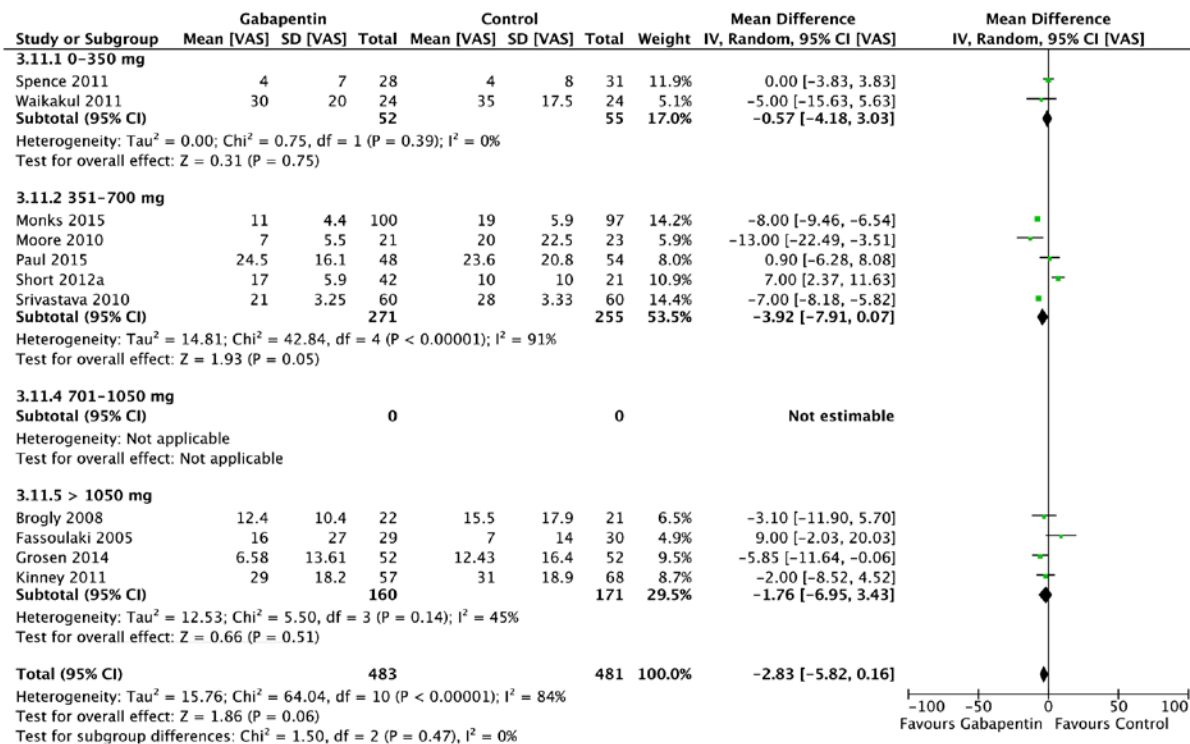

## Supplemental Digital Content 10 Forest plot of VAS 24h rest from all trials estimates

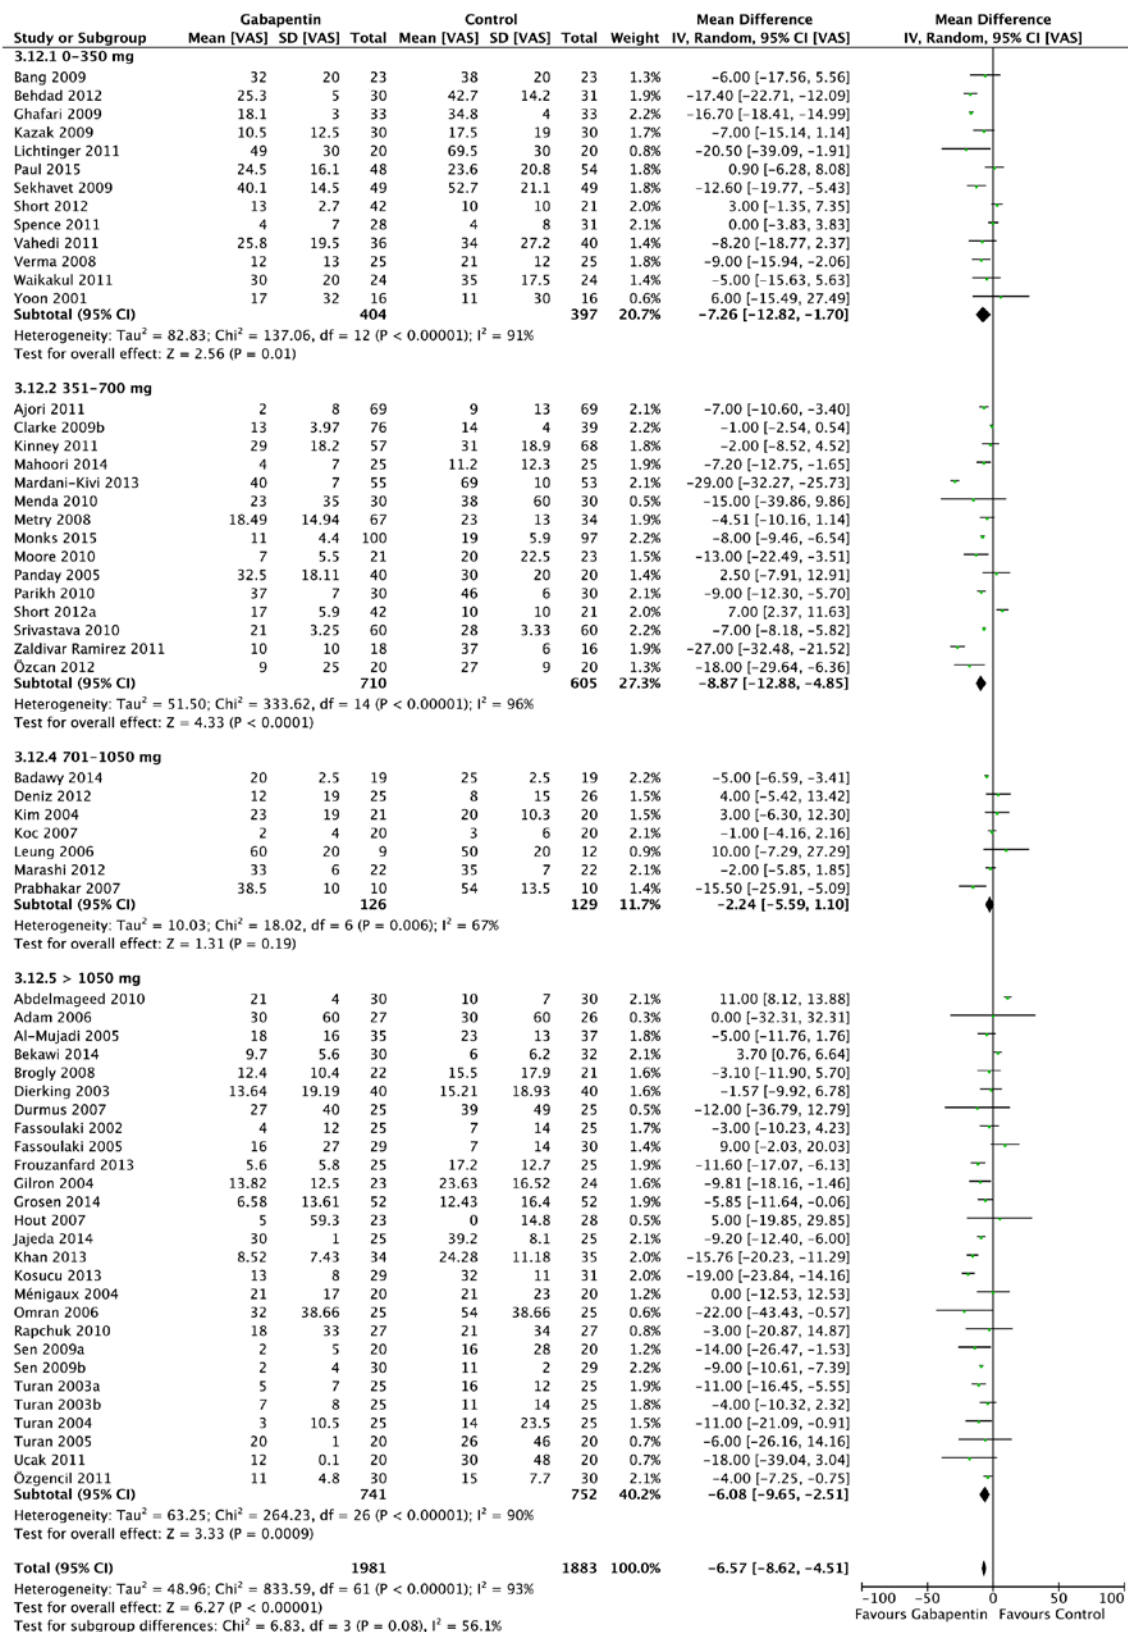

Supplemental Digital Content 11 Forest plot of VAS 24h mobilization from trials with low risk of bias

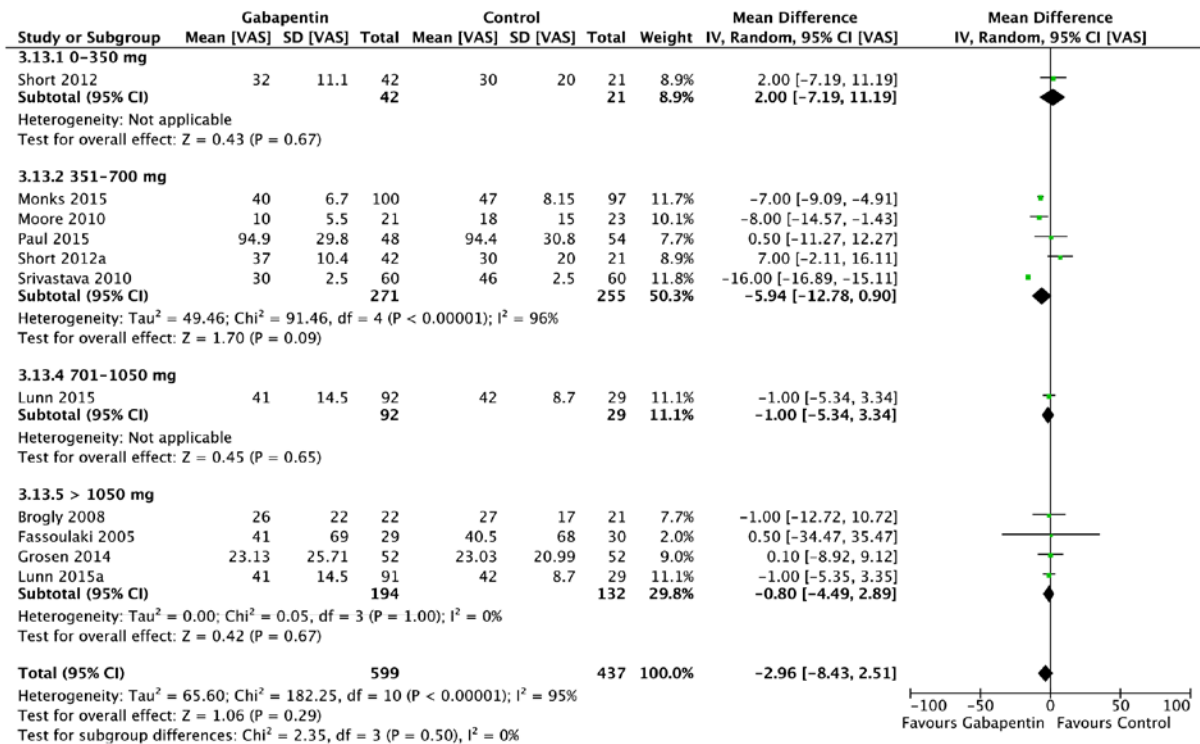



Supplemental Digital Content 12 Forest plot of VAS 24h mobilization from all trials estimates

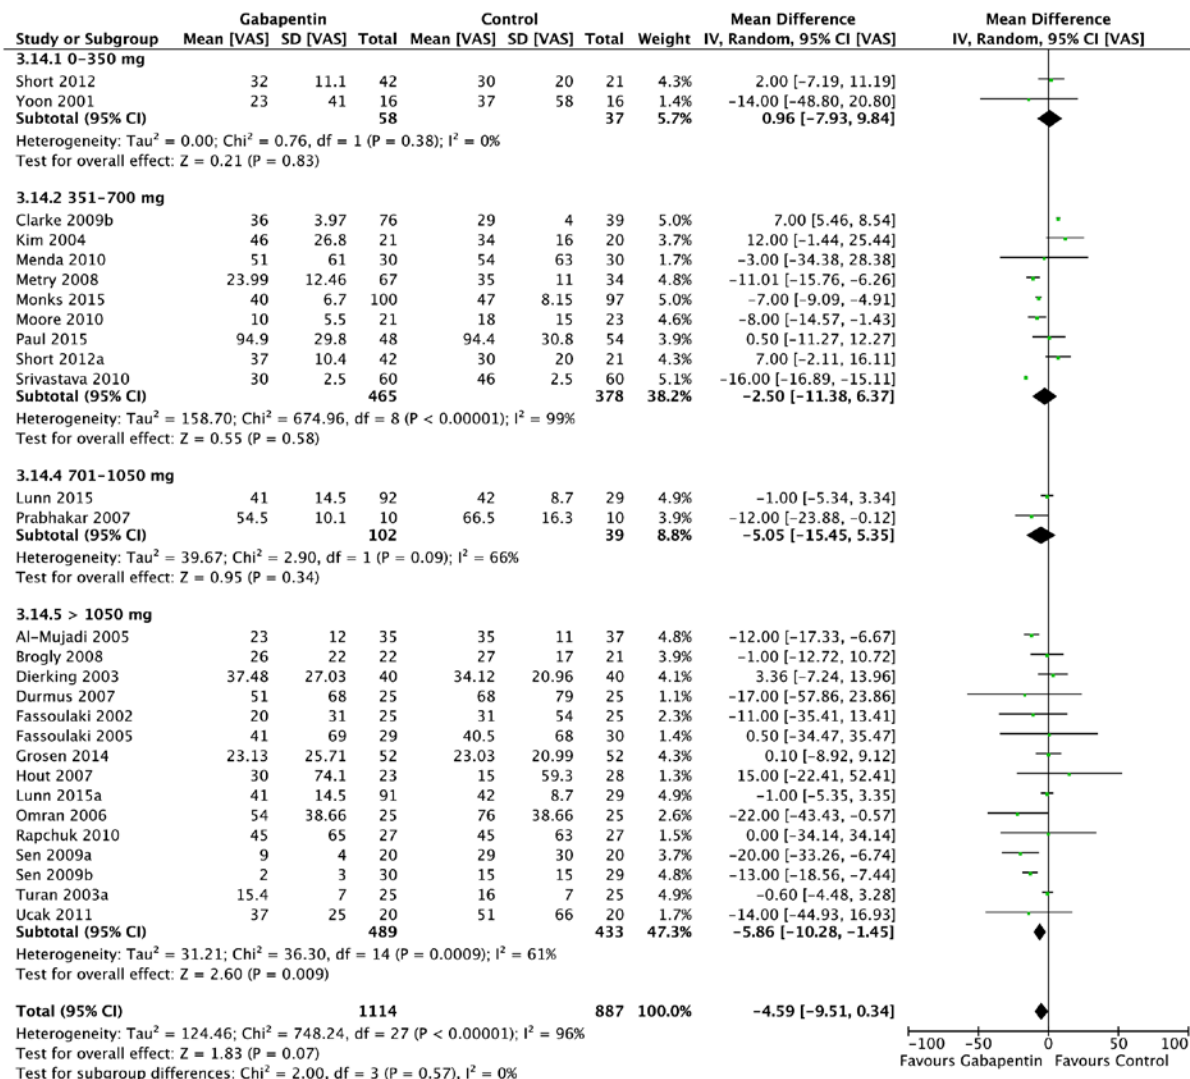

Supplemental Digital Content 13 Forest plot of nausea from trials with low risk of bias

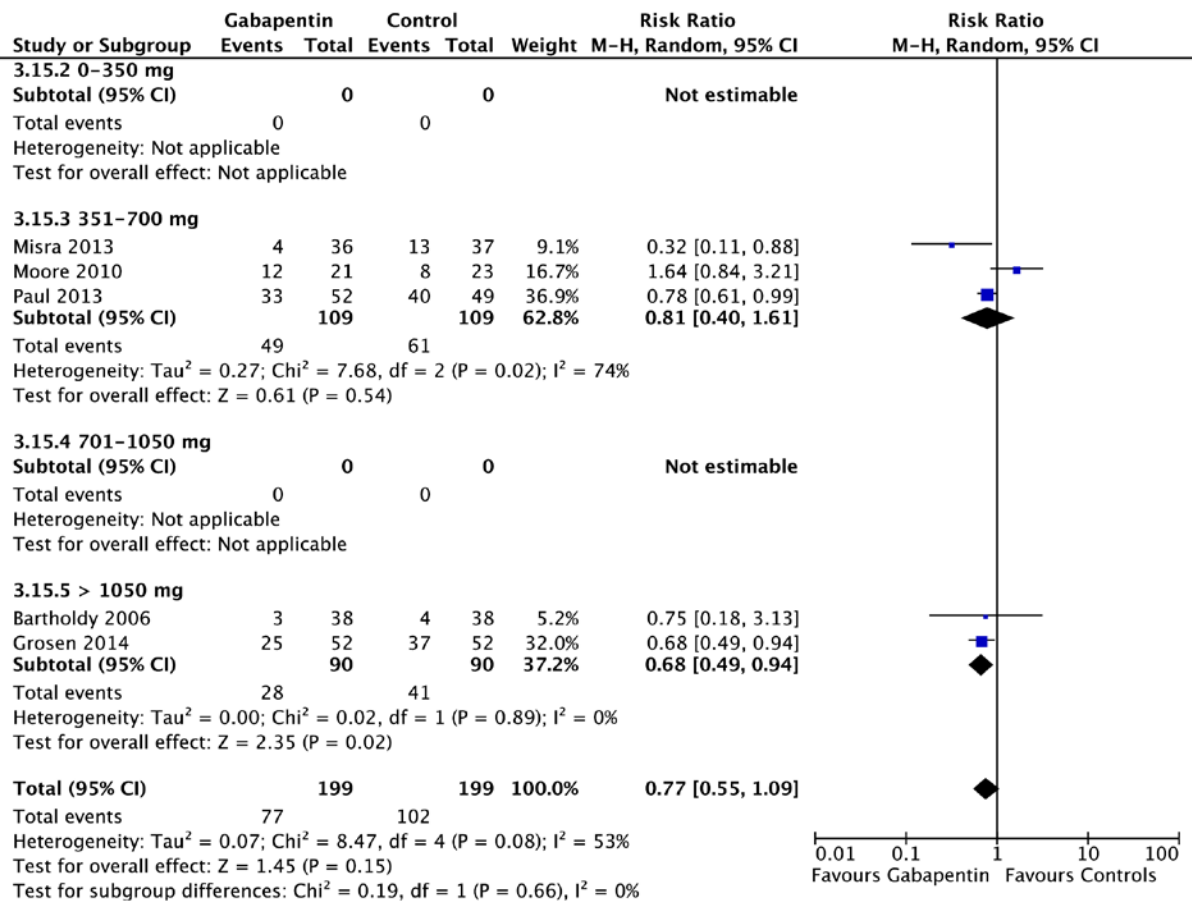

## Supplemental Digital Content 14 Forest plot of nausea from all trials estimates

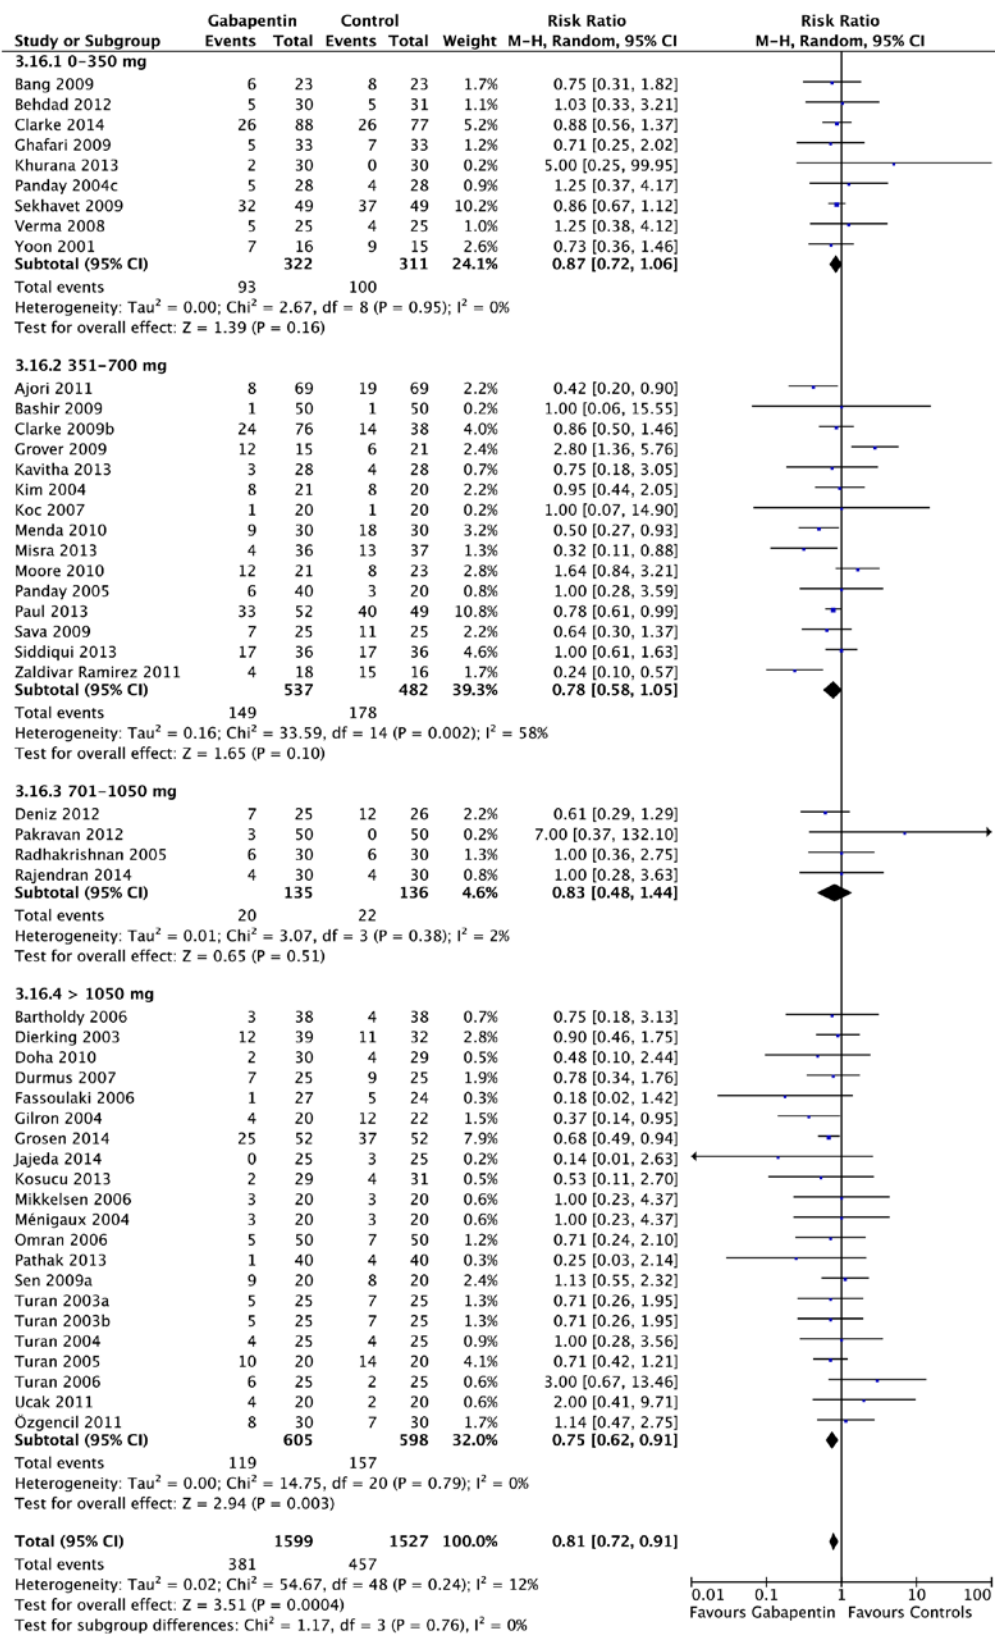

Supplemental Digital Content 15 Forest plot of vomiting from trials with low risk of bias

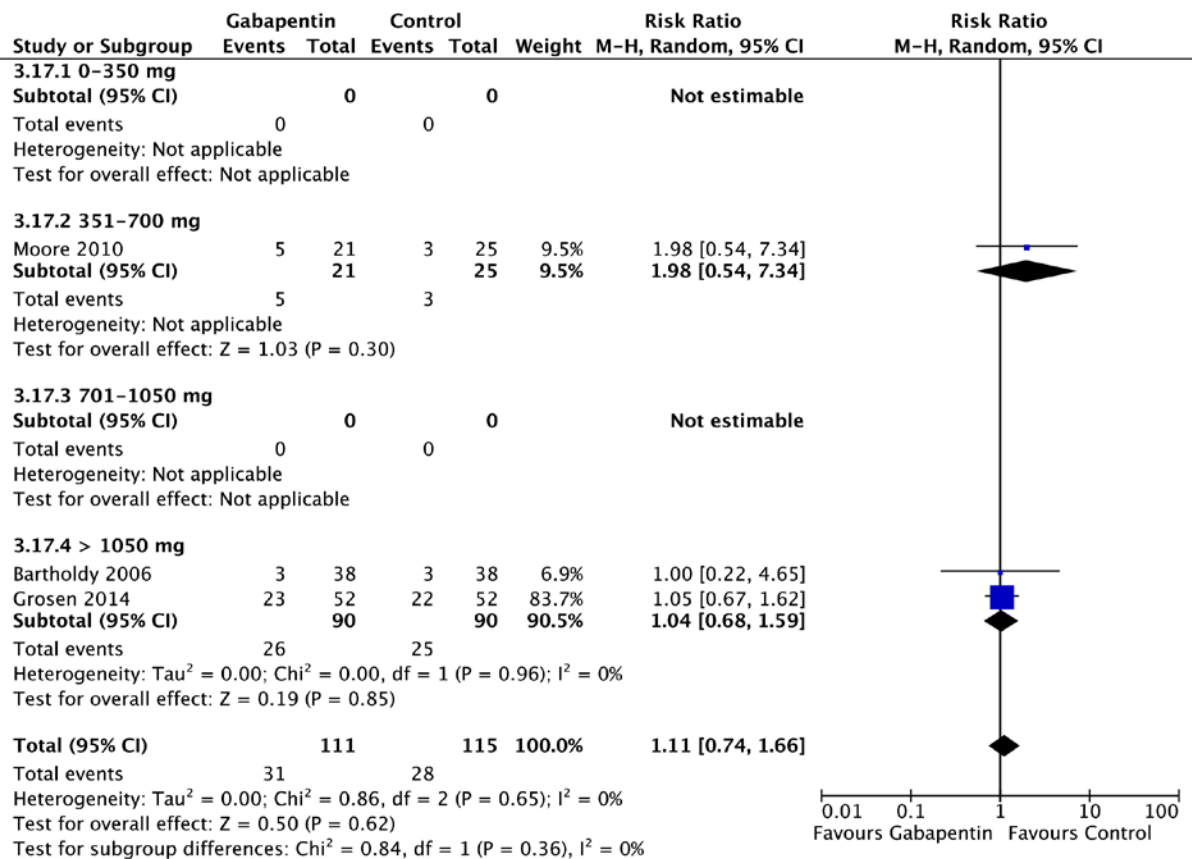

Supplemental Digital Content 16 Forest plot of vomiting from all trials estimates

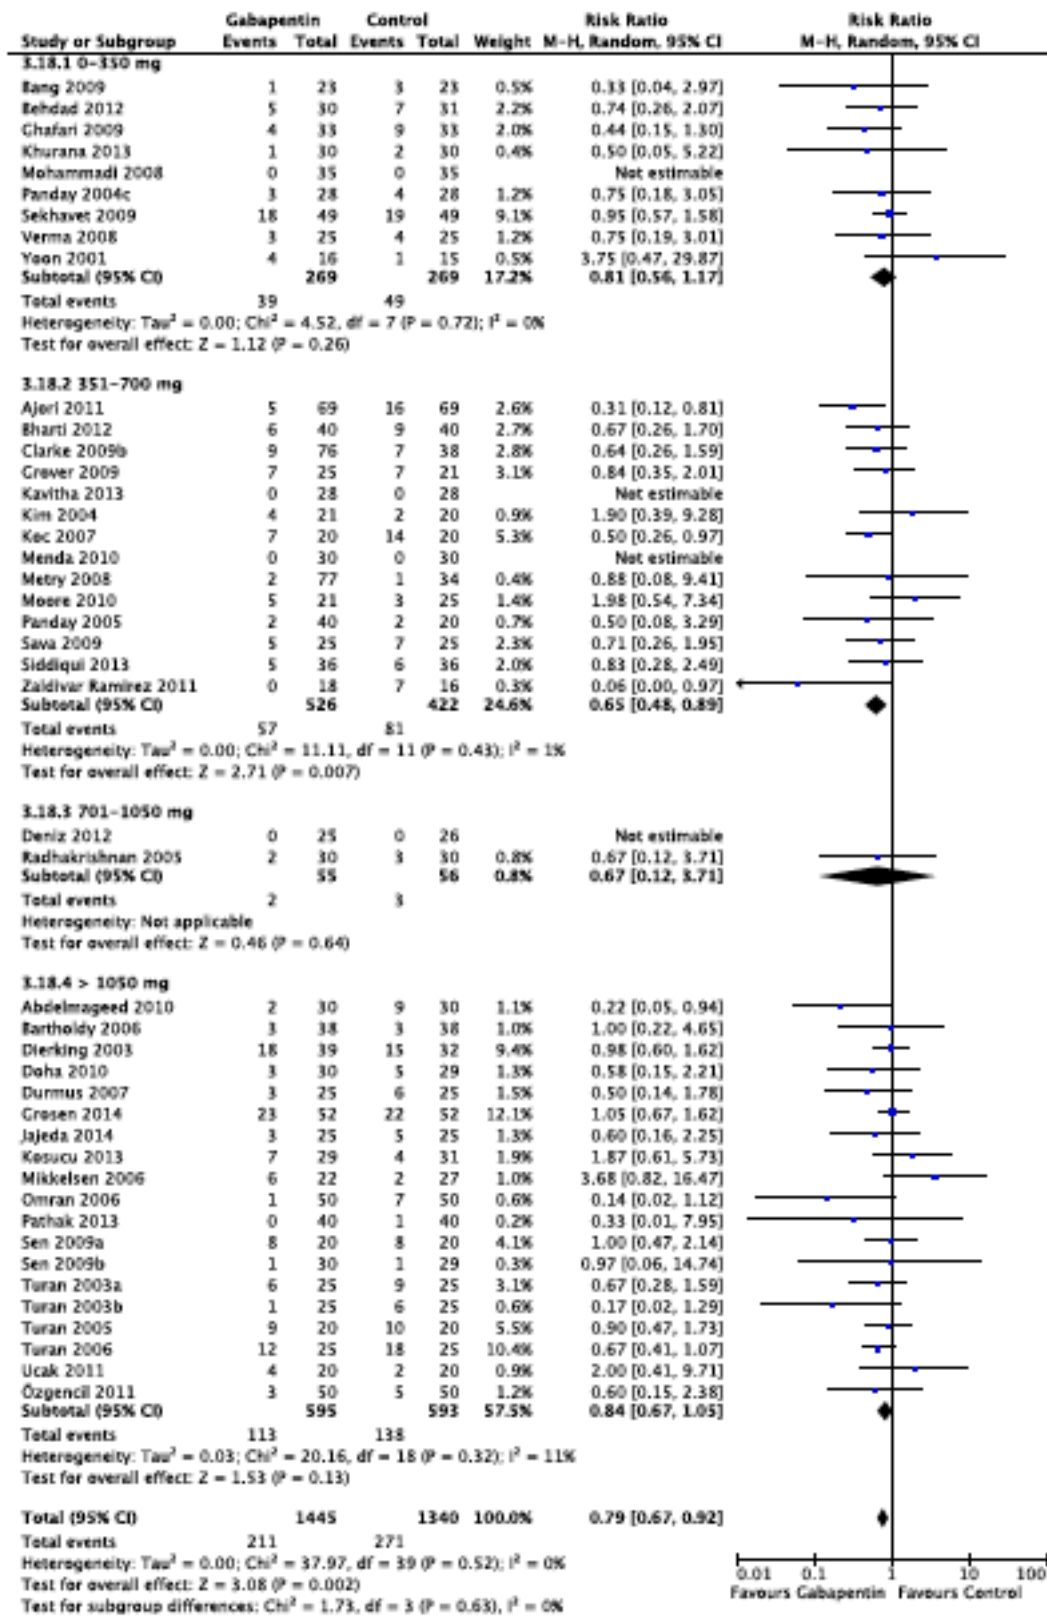

Supplemental Digital Content 17 Forest plot of sedation from trials with low risk of bias

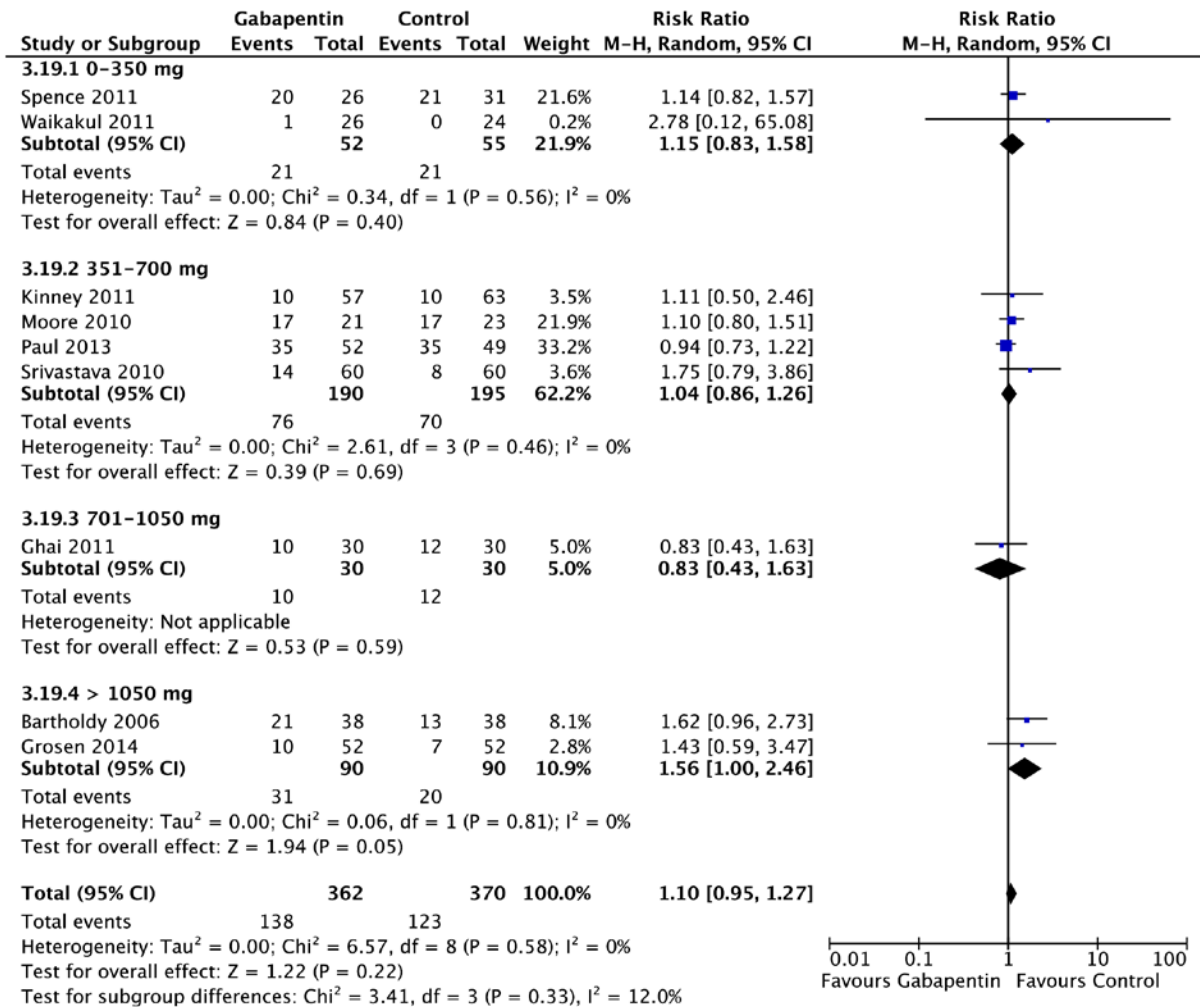



## Supplemental Digital Content 18 Forest plot of sedation from all trials estimates

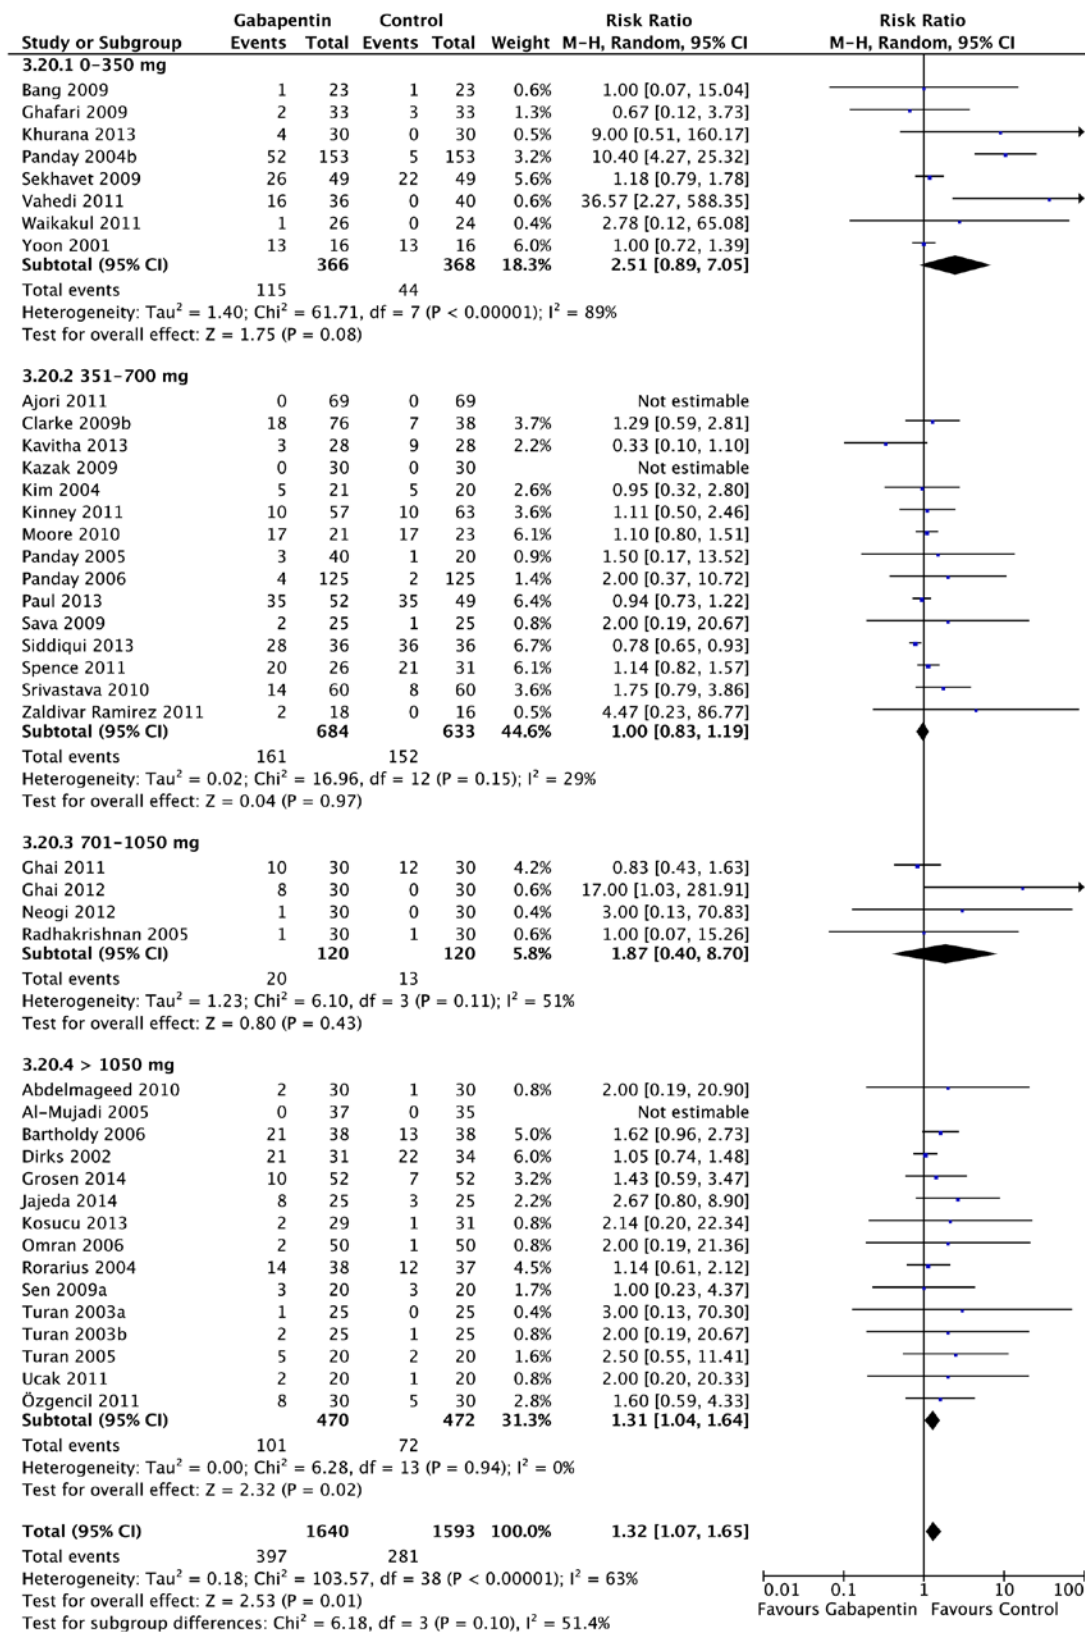

Supplemental Digital Content 19 Forest plot of dizziness from trials with low risk of bias

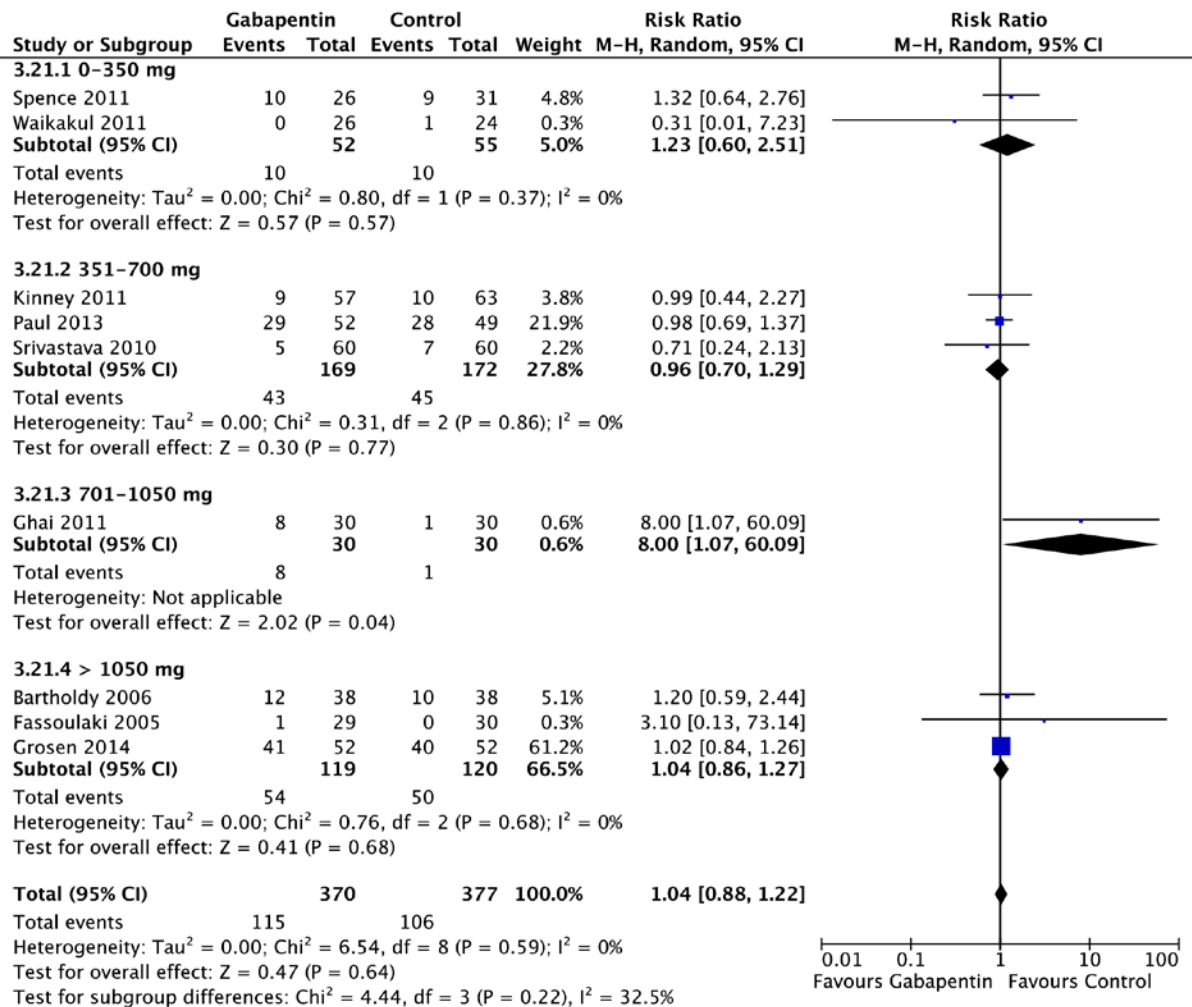



Supplemental Digital Content 20 Forest plot of dizziness from all trials estimates

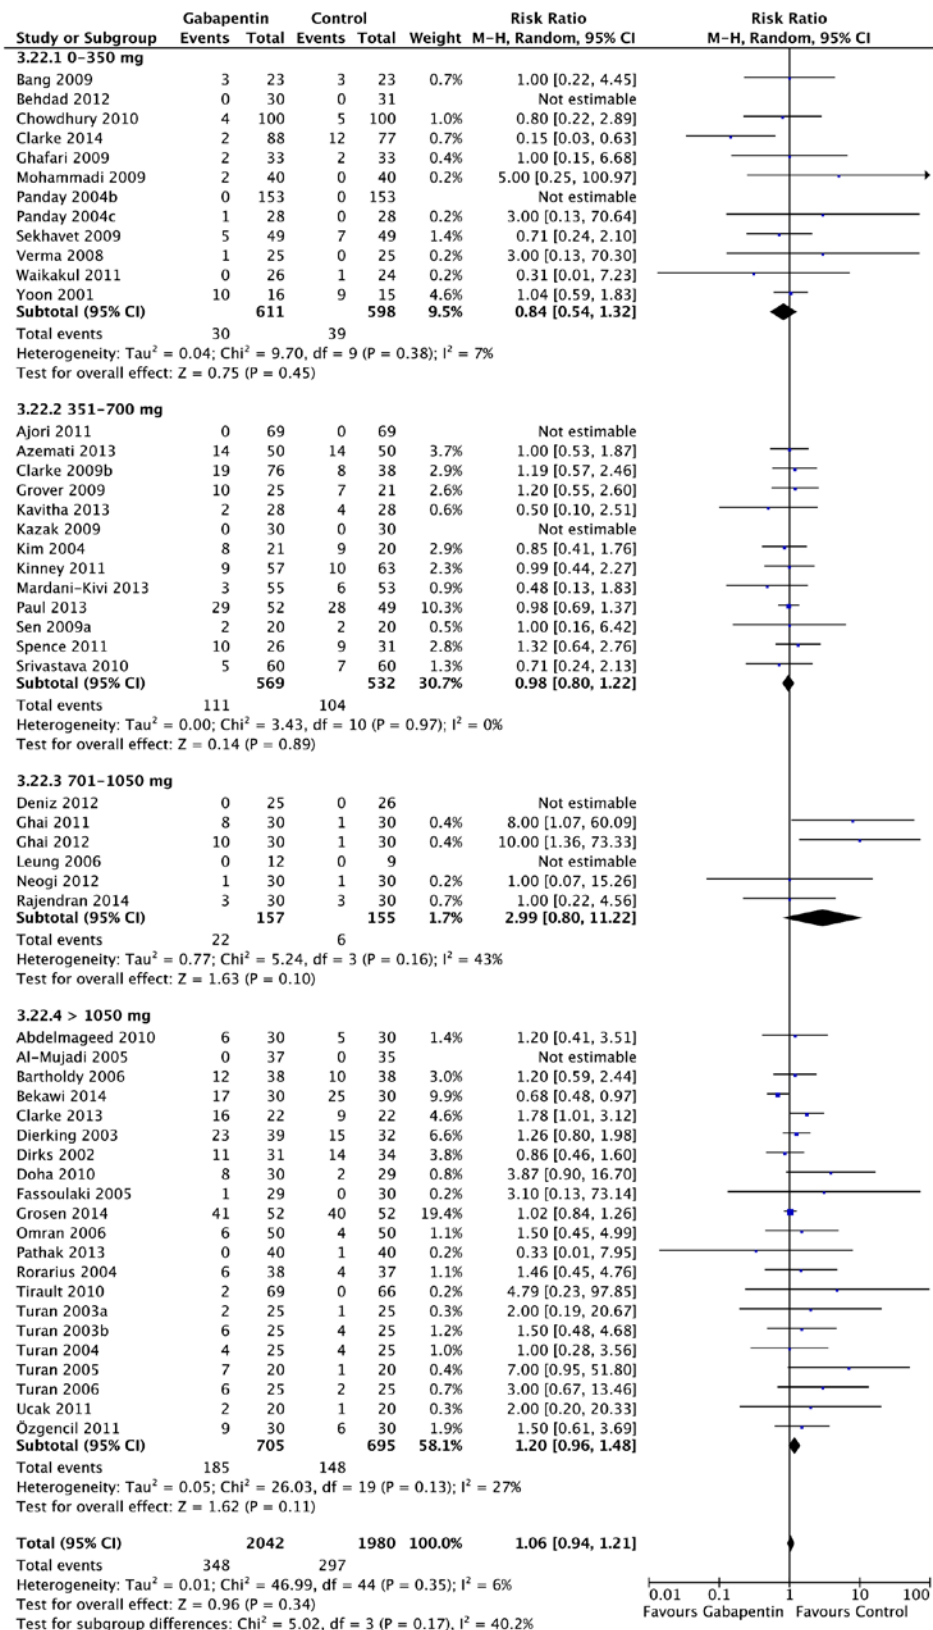

Supplement: Supplementary file 1 [file get_supplementary_file.php]
